# Supplementary material for: Merging the ring opening of benzoxazoles with secondary amines and an iron-catalyzed oxidative cyclization towards the environmentally friendly synthesis of 2-aminobenzoxazoles
Source: Royal Society of Chemistry journal article supplement (doi:10.1039/c3gc41206g), 2013-01-01

5

## Electronic Supplementary Information

# **Merging the Ring Opening of Benzoxazoles with Secondary Amines and Iron- Catalyzed Oxidative Cyclization toward the Environmentally Friendly Synthesis of 2-Aminobenzoxazoles**

<sup>10</sup> Daqian Xu, Wenfang Wang, Chengxia Miao, Qiaohong Zhang, Chungu Xia, Wei Sun\*

15

20

25

## Spectral copies of $^1\text{H}$ and $^{13}\text{C}$ NMR of the products and the benzoxazole derivatives

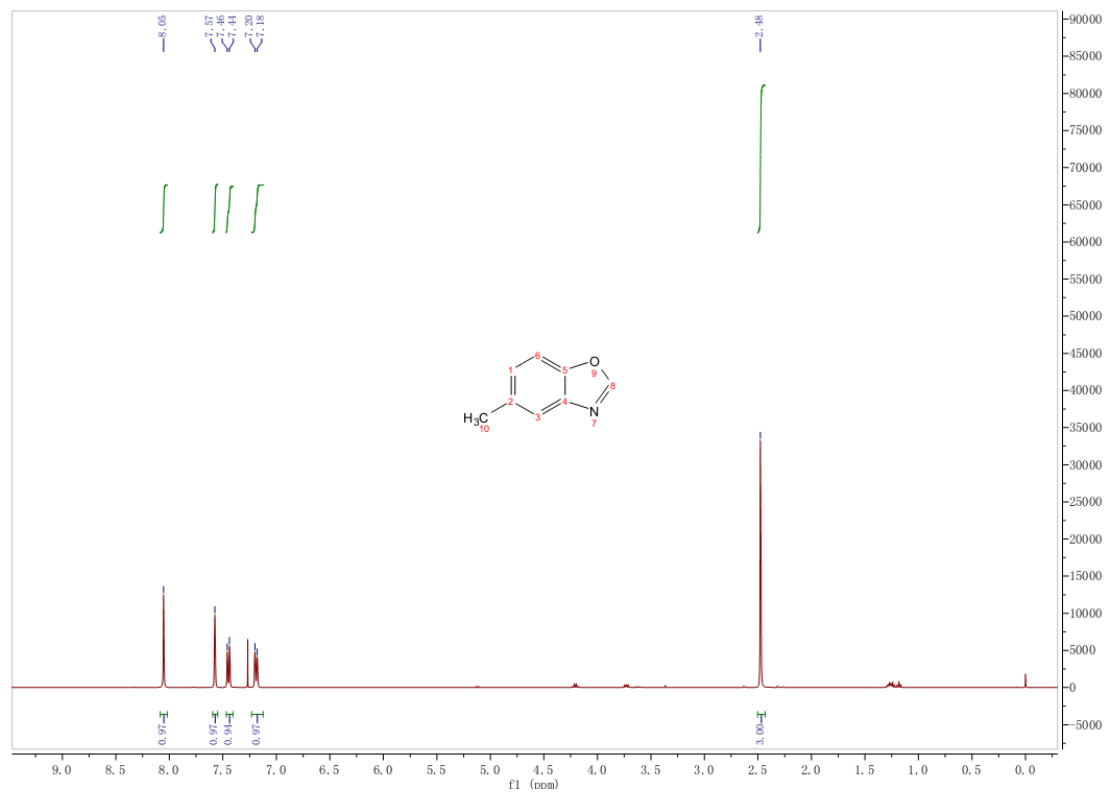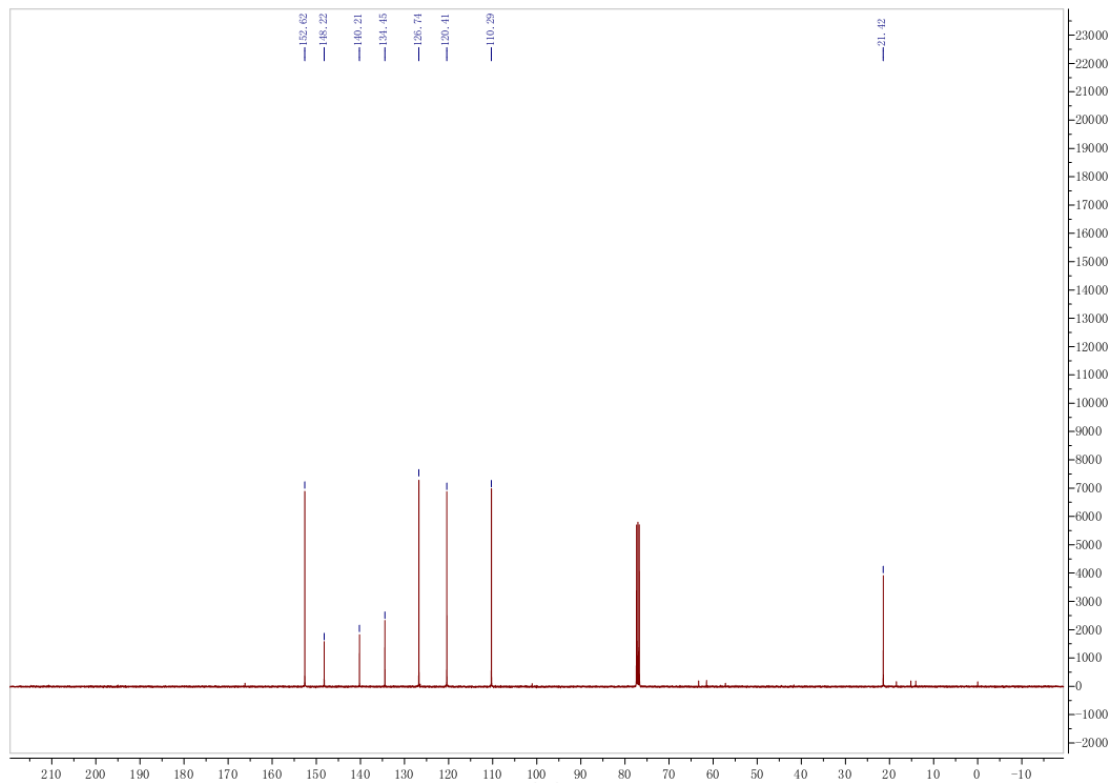

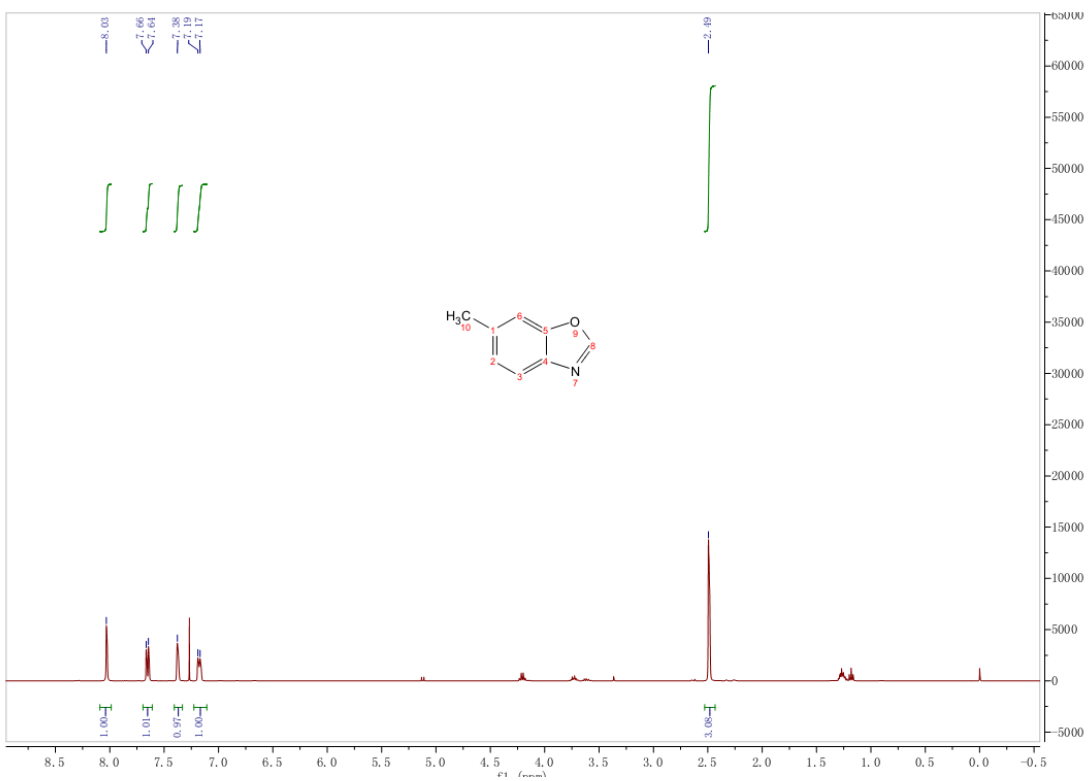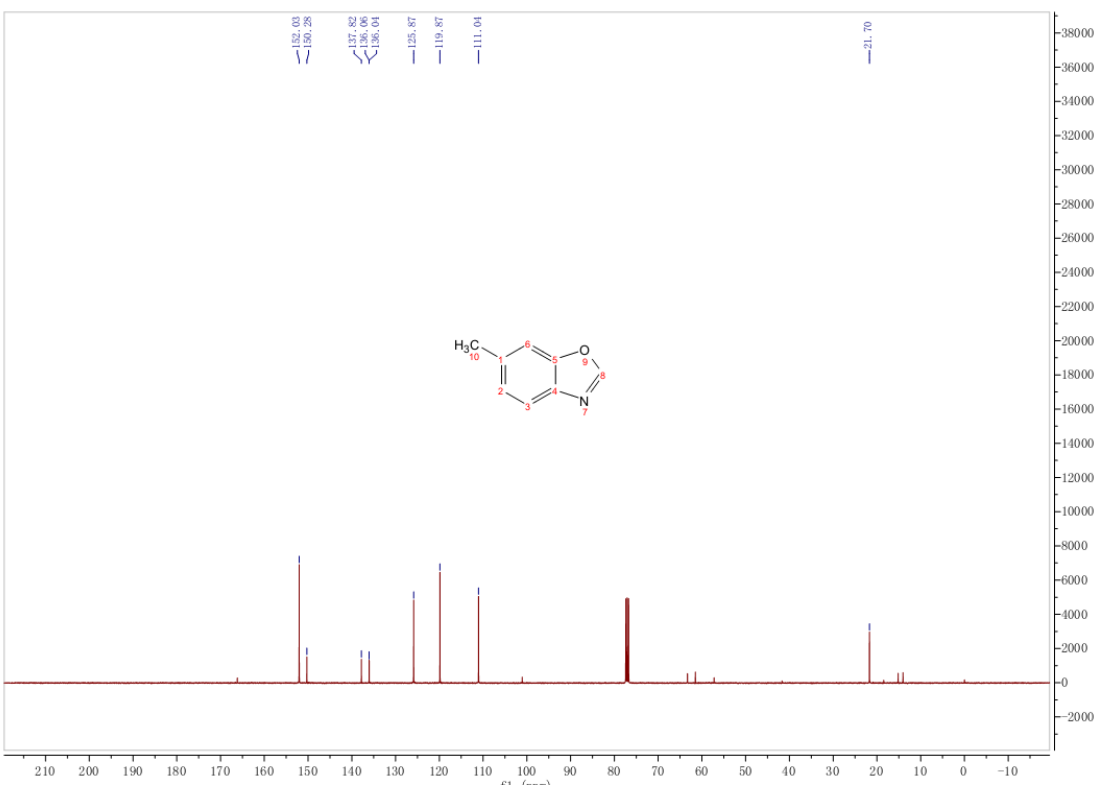

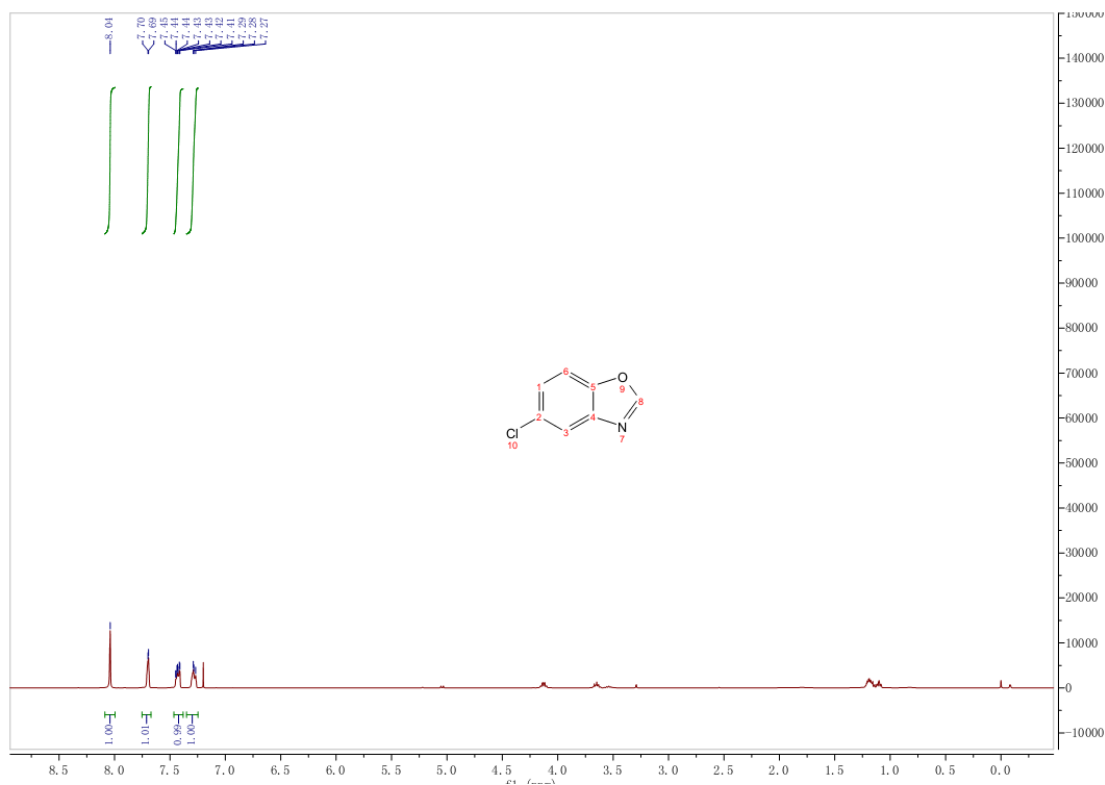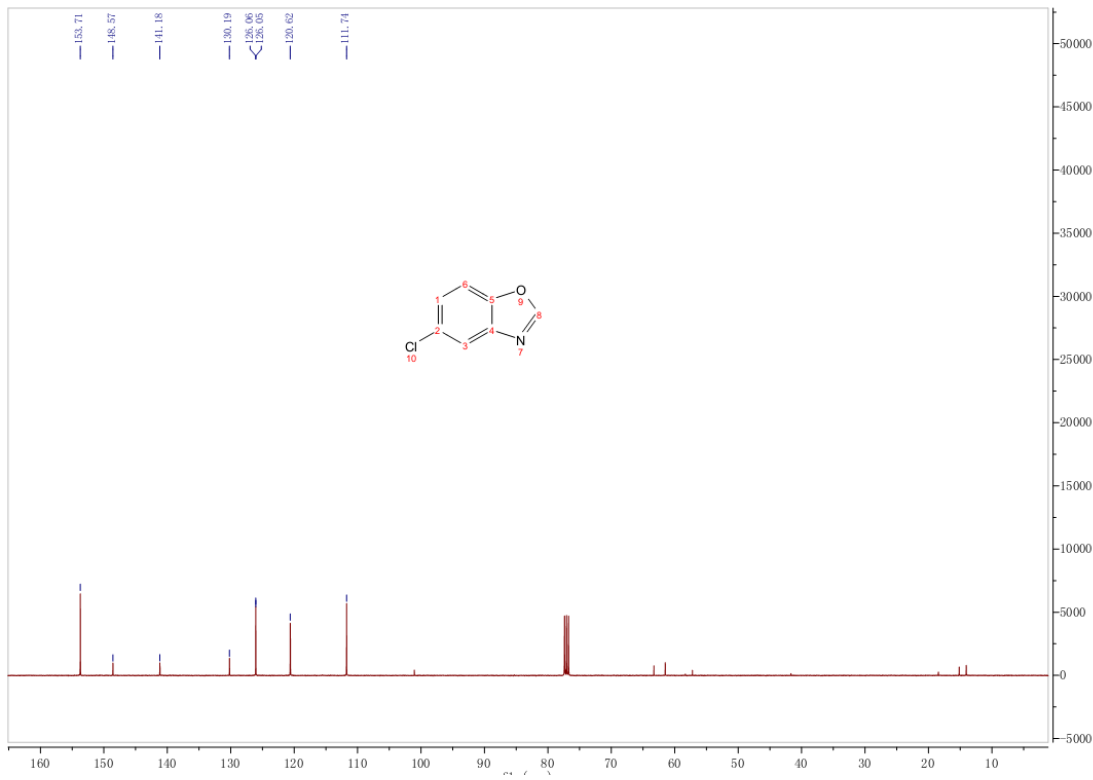

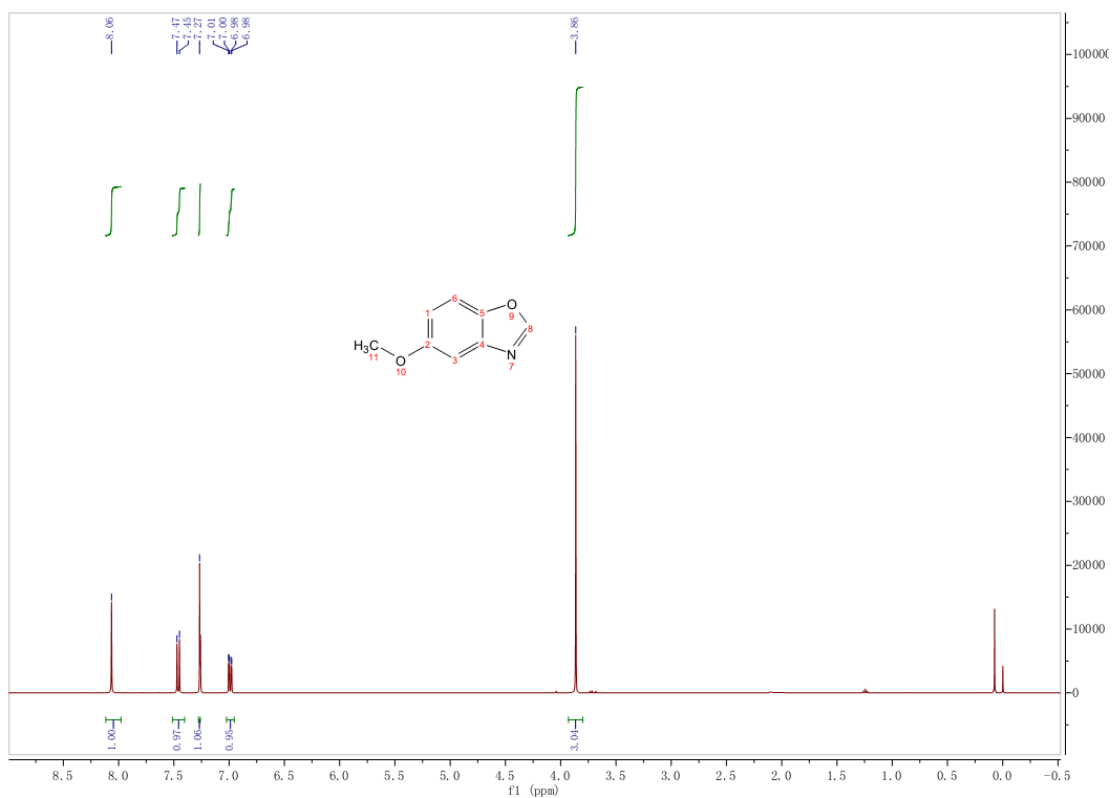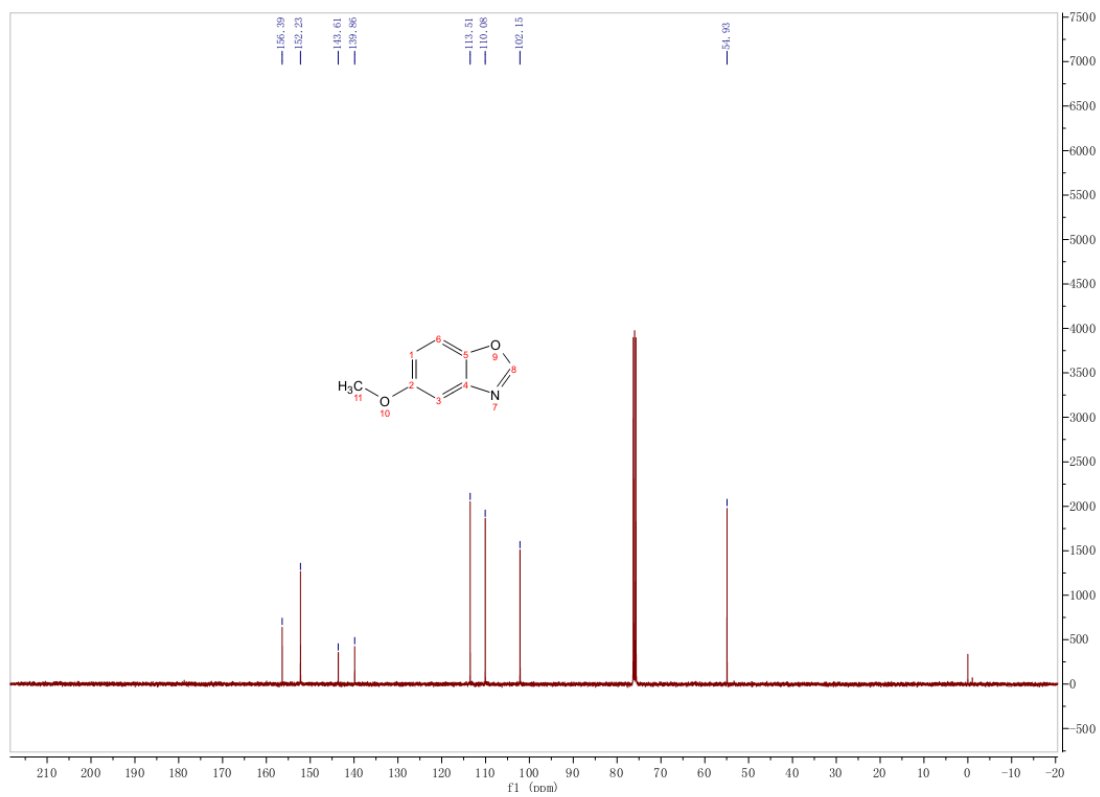

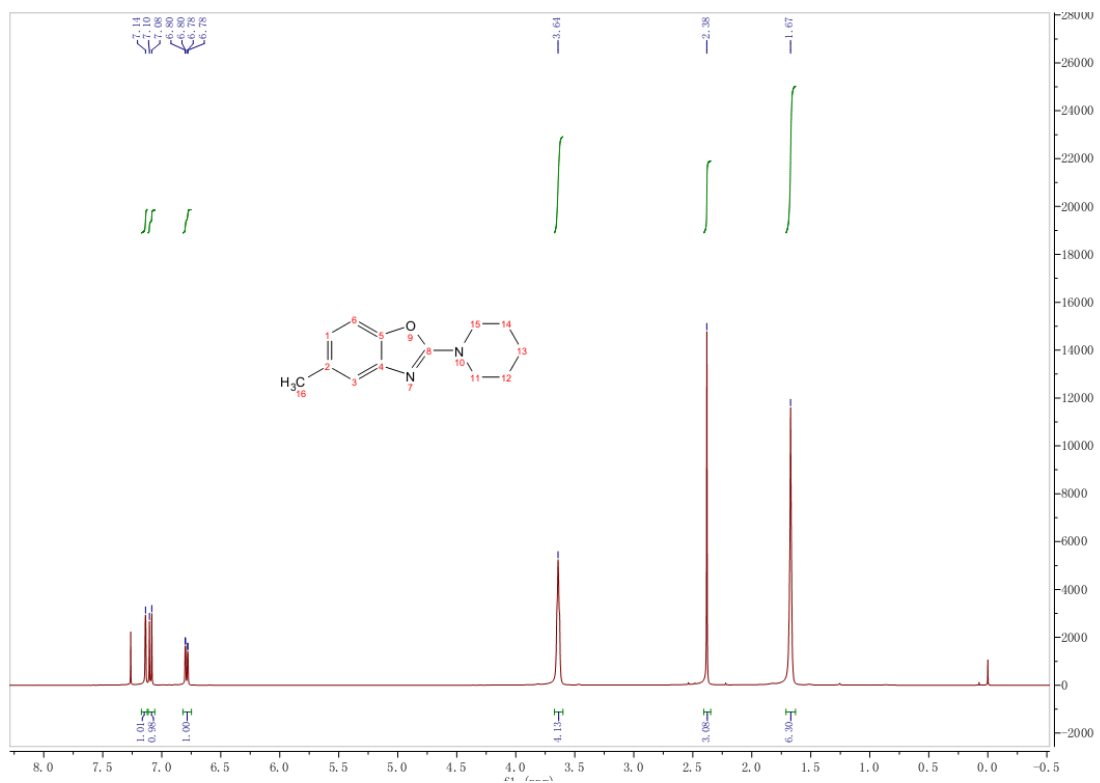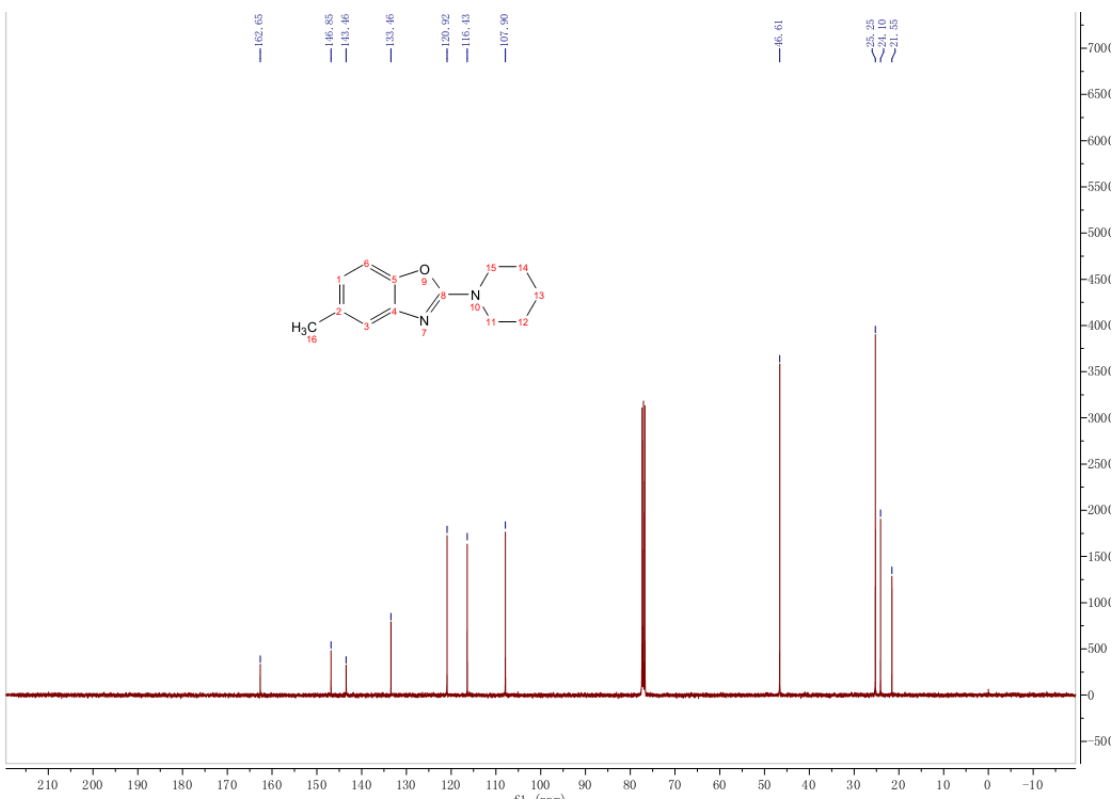

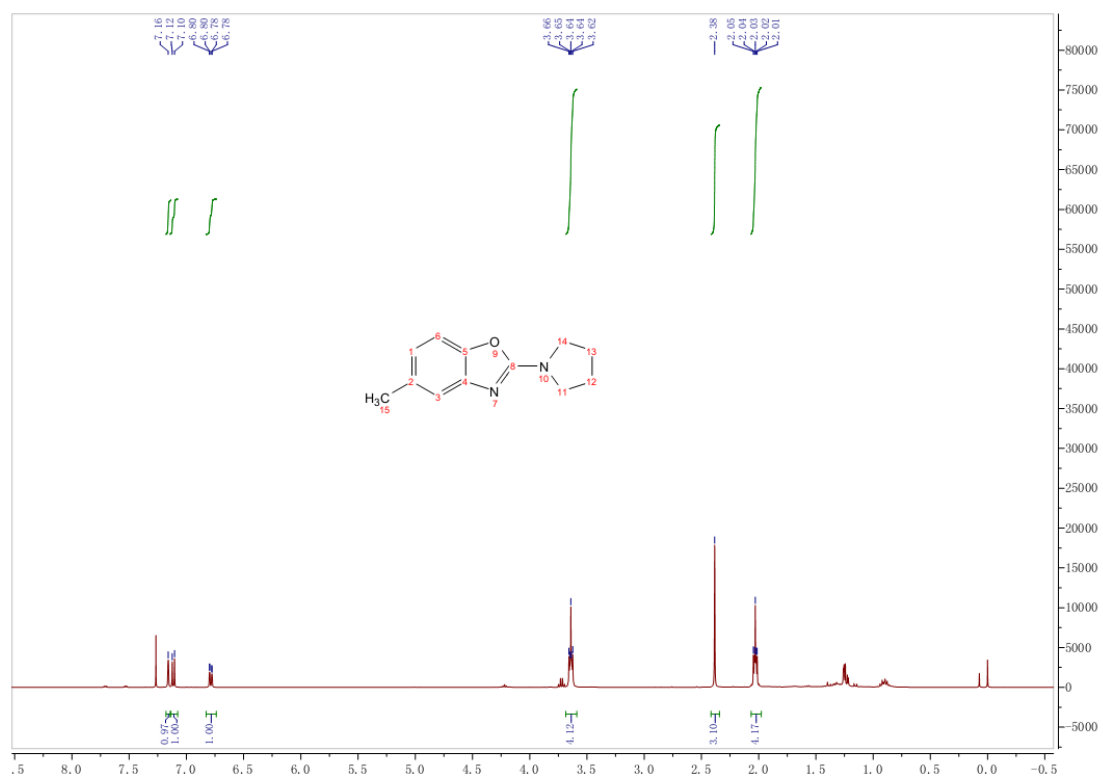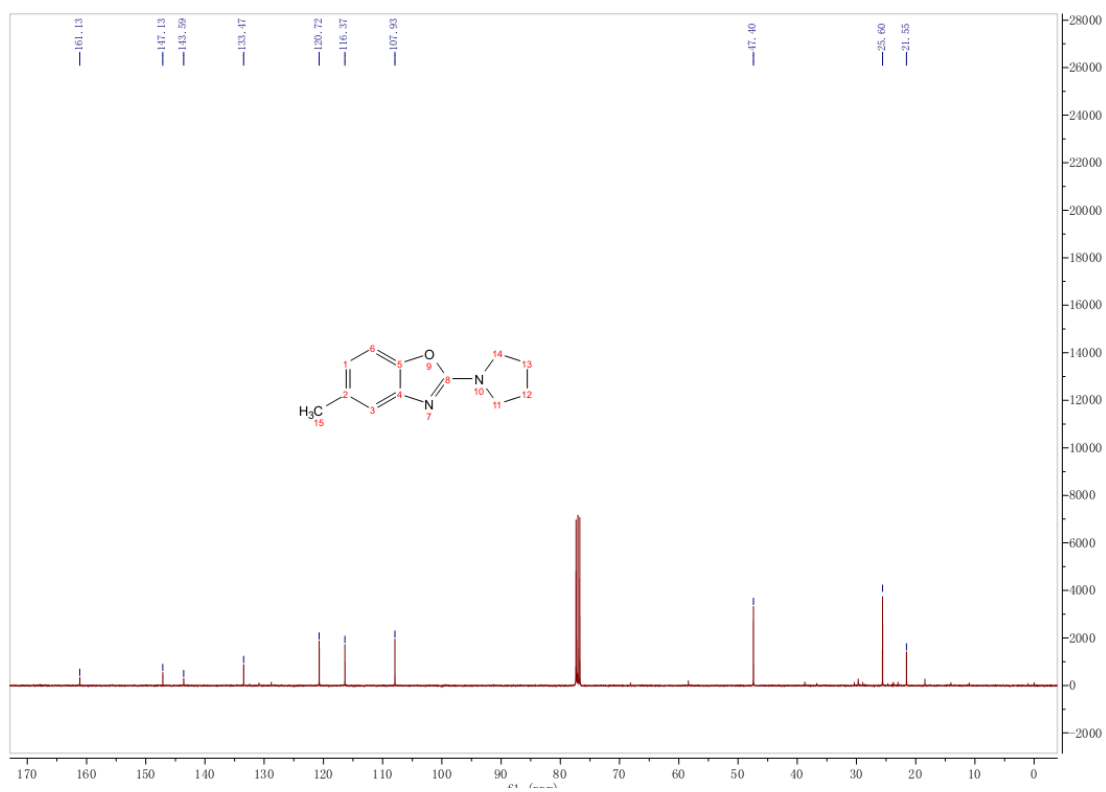

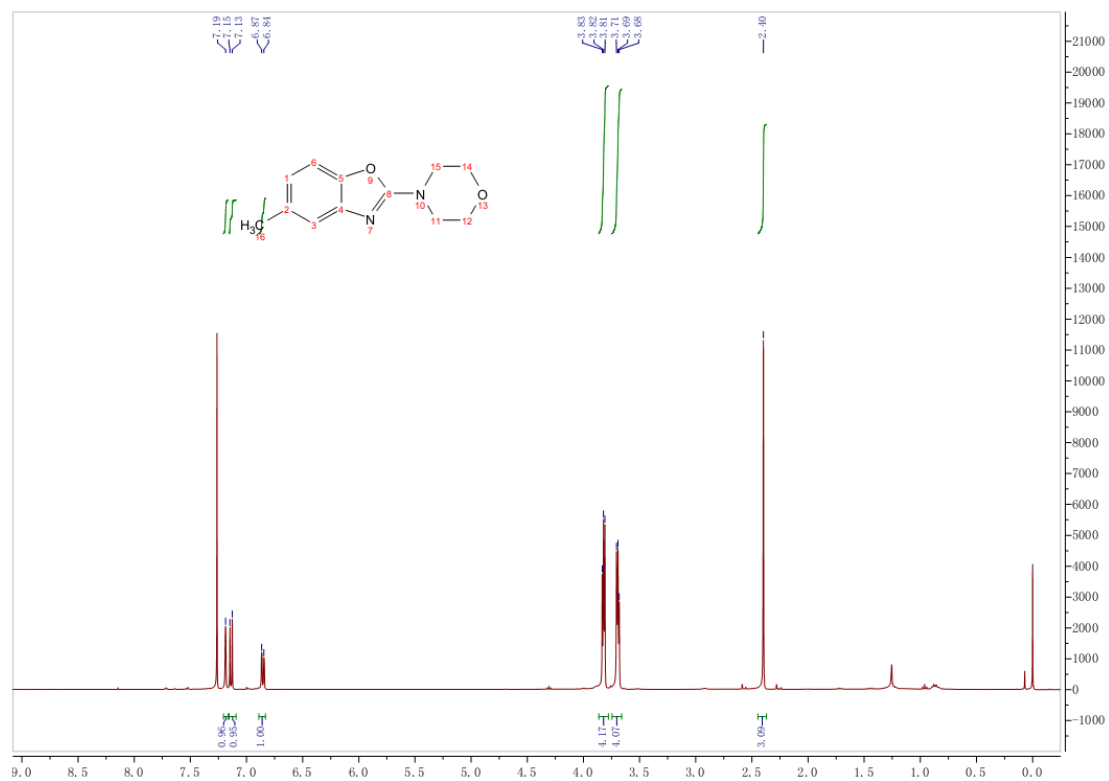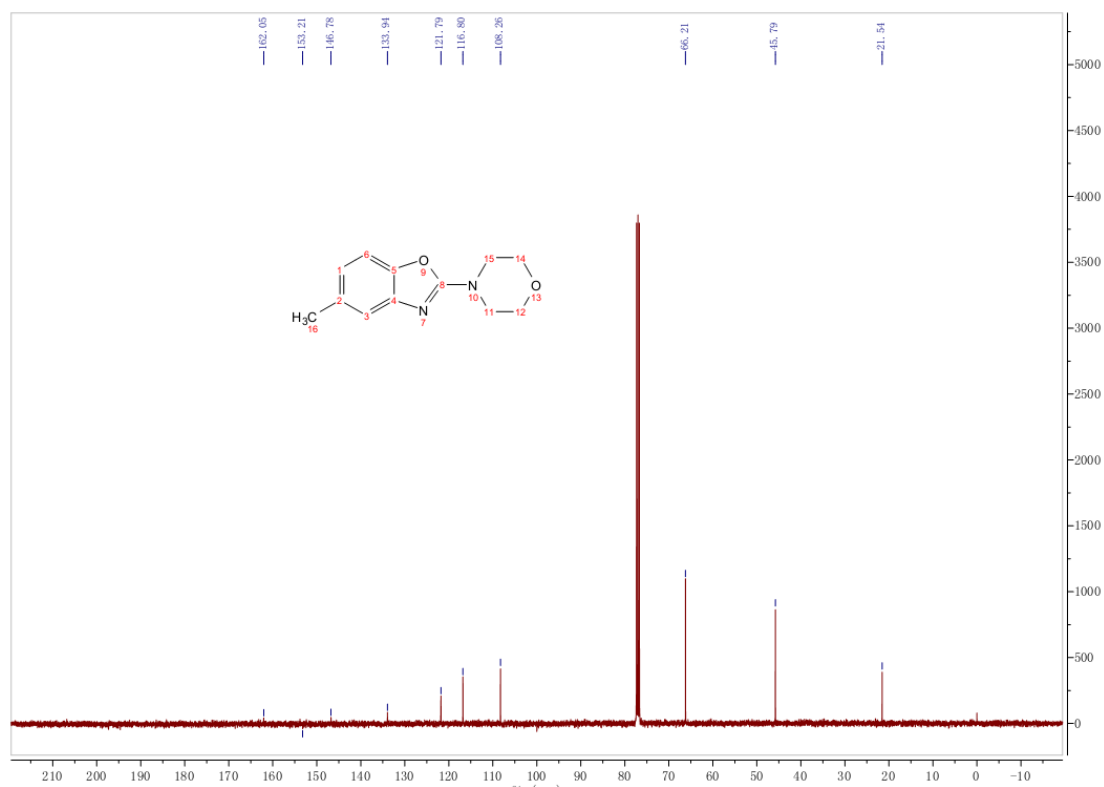



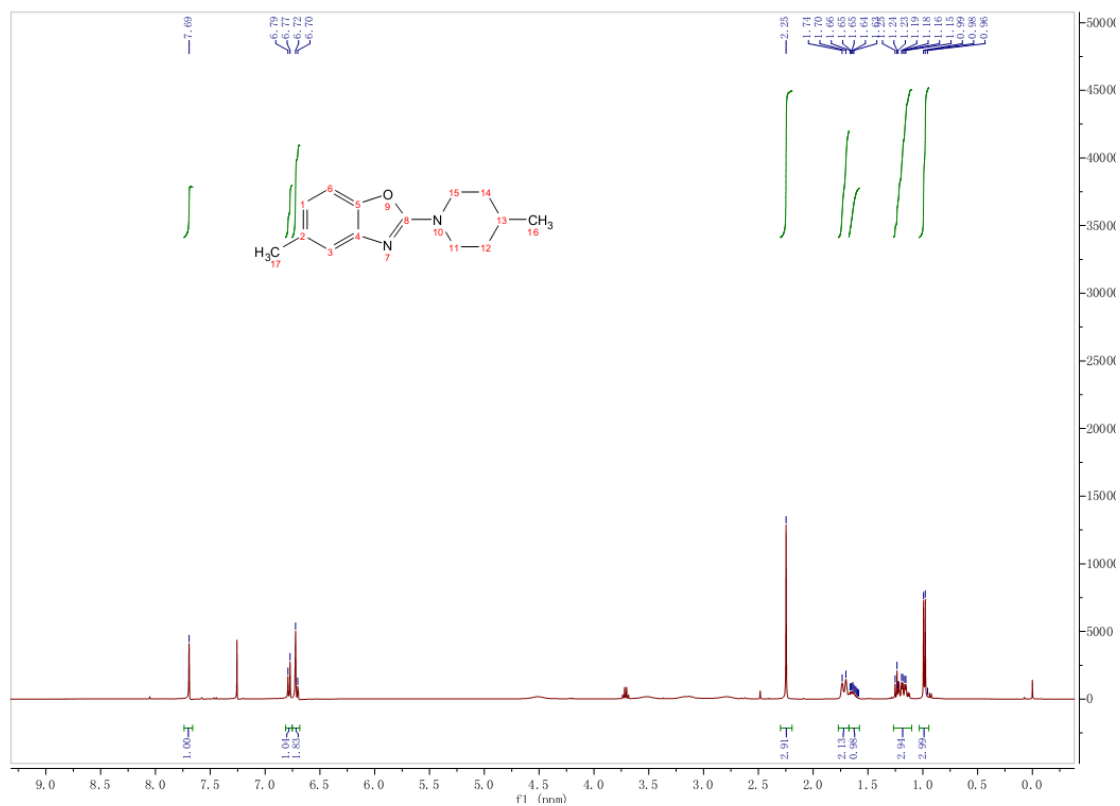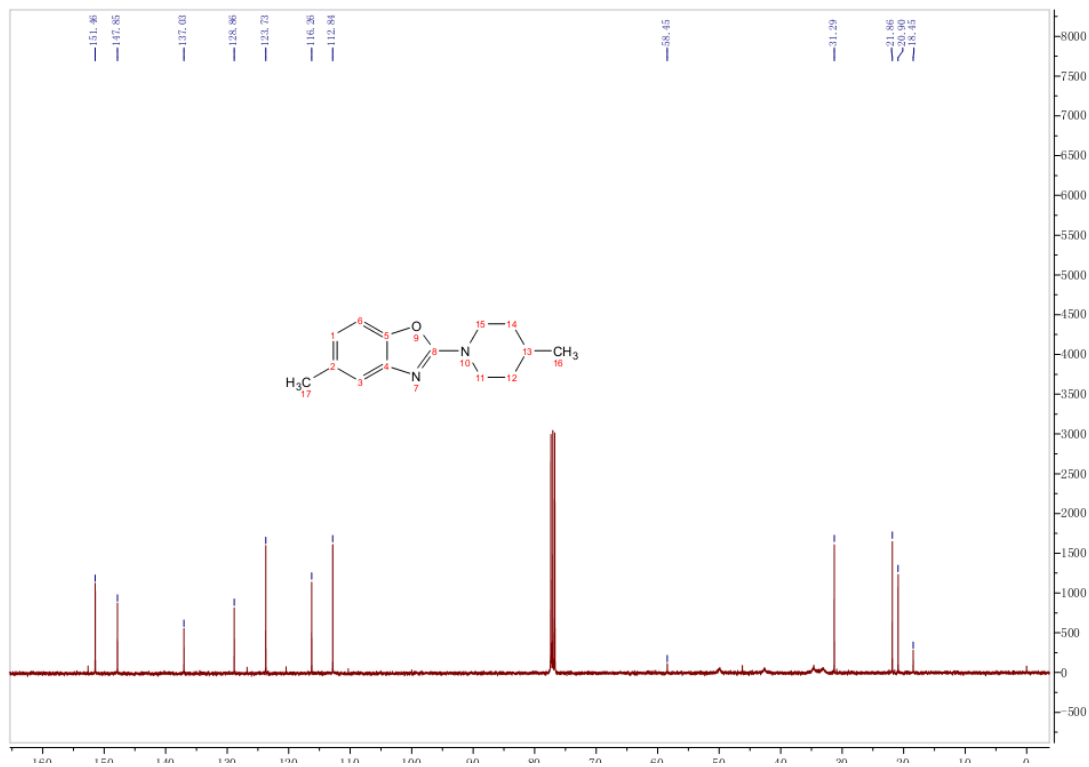

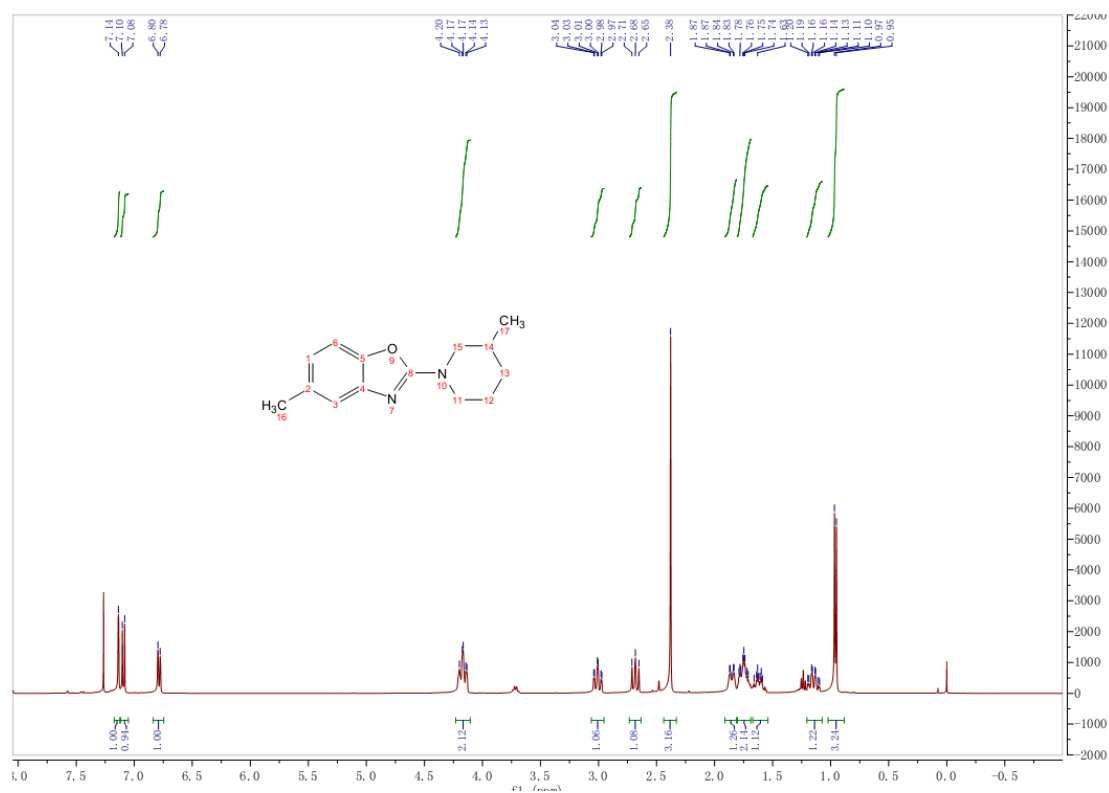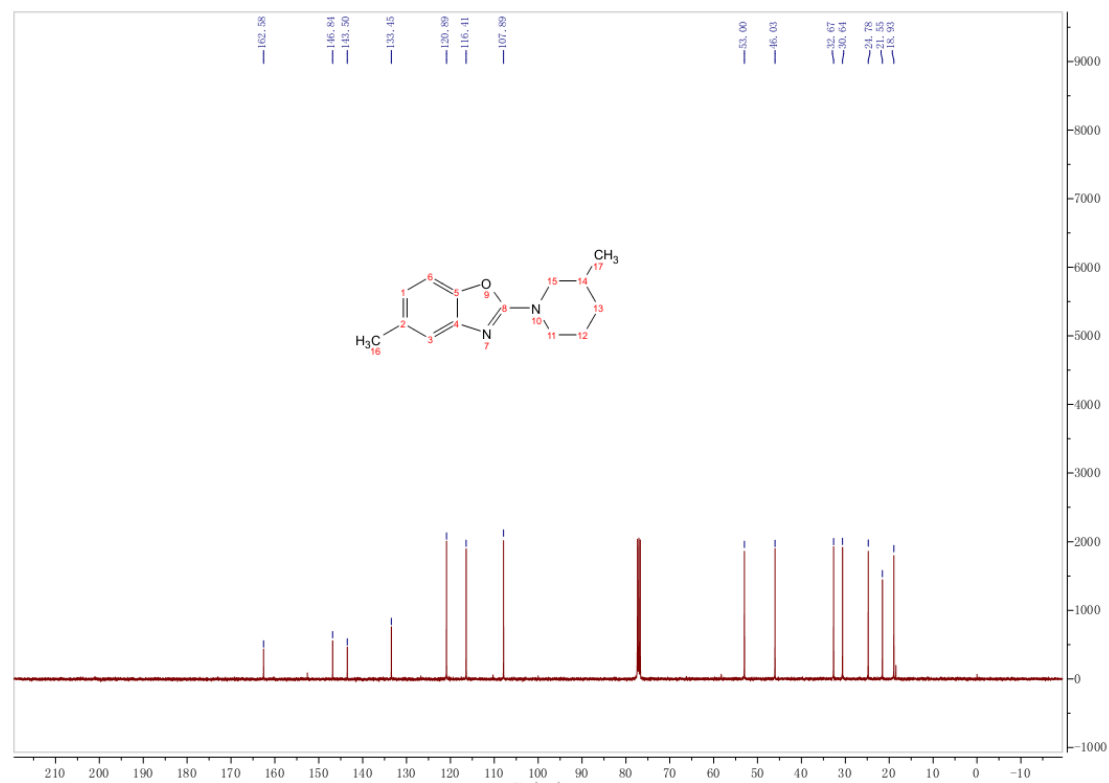

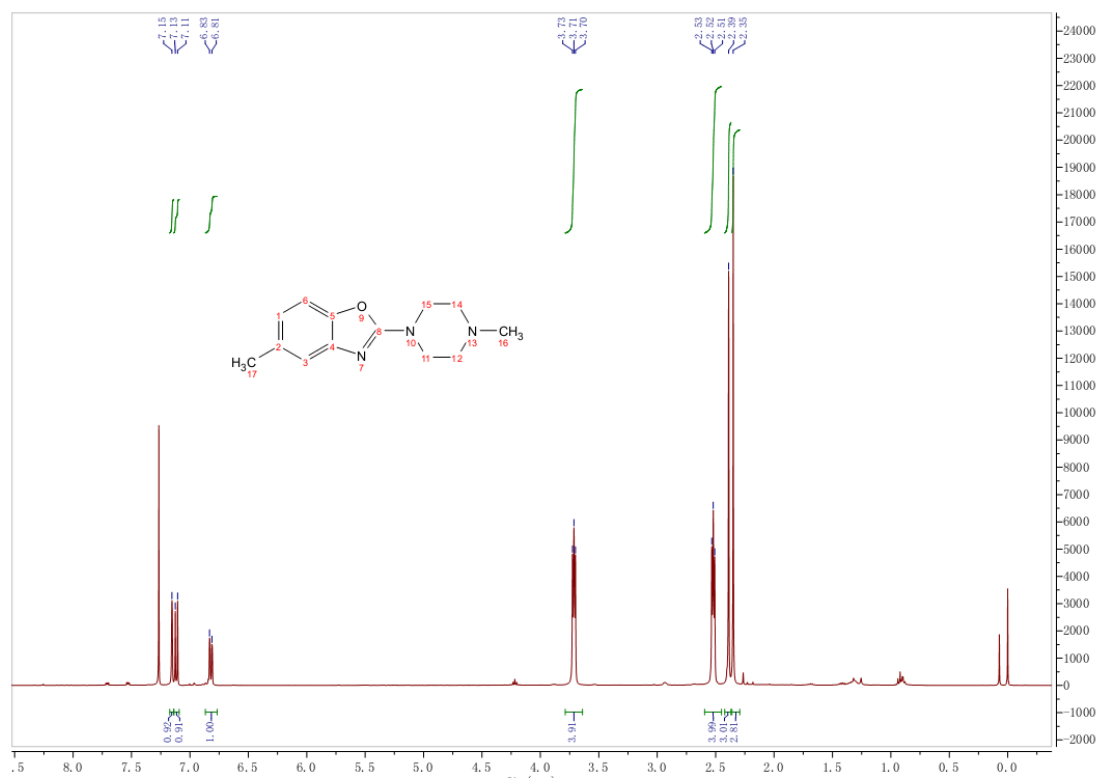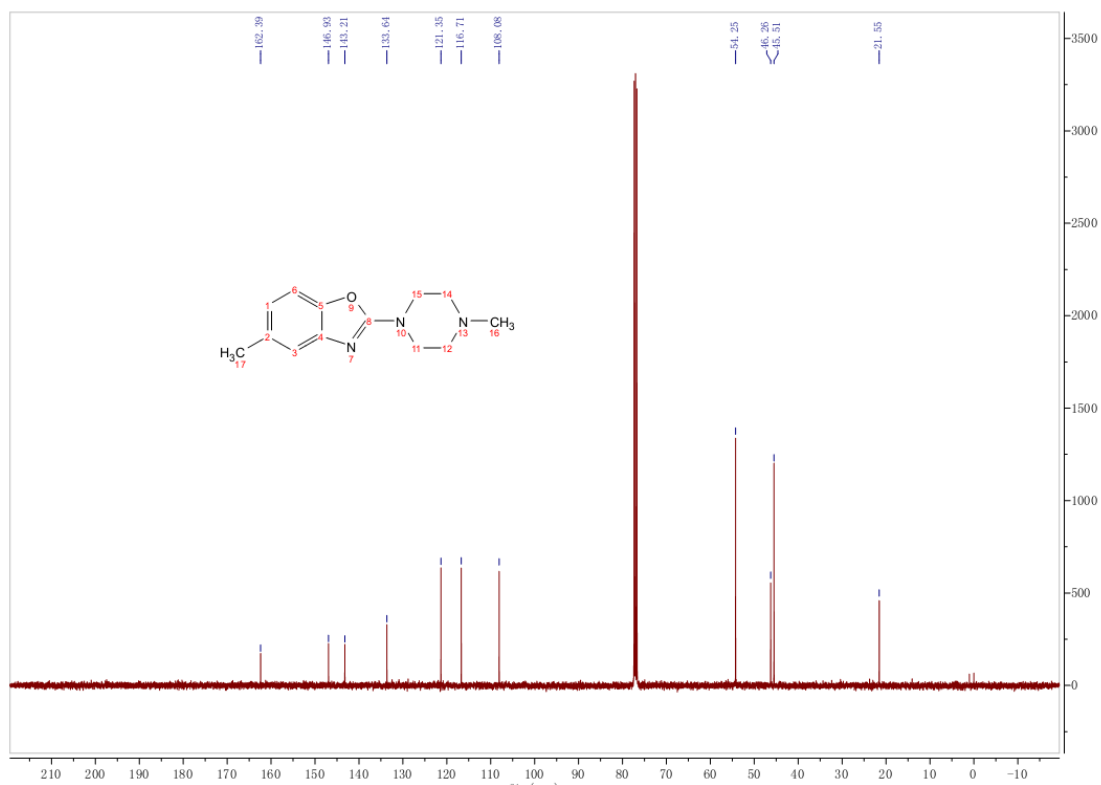

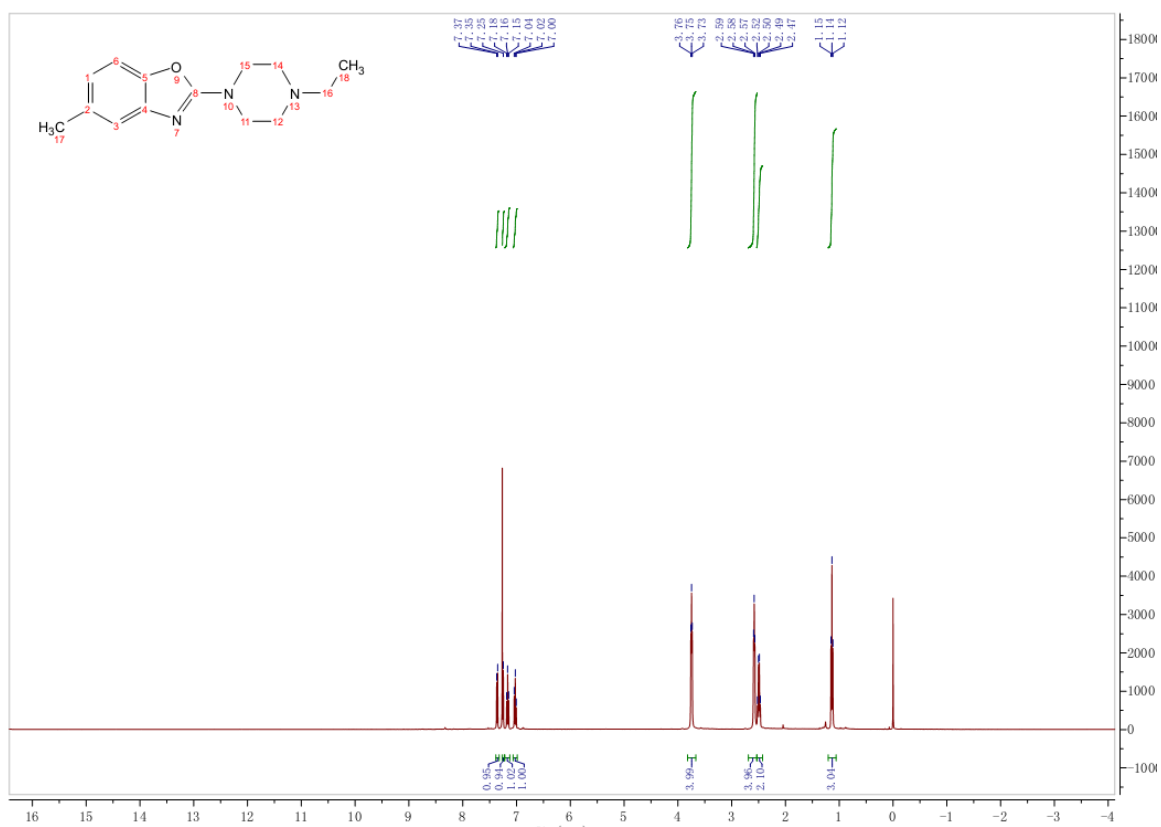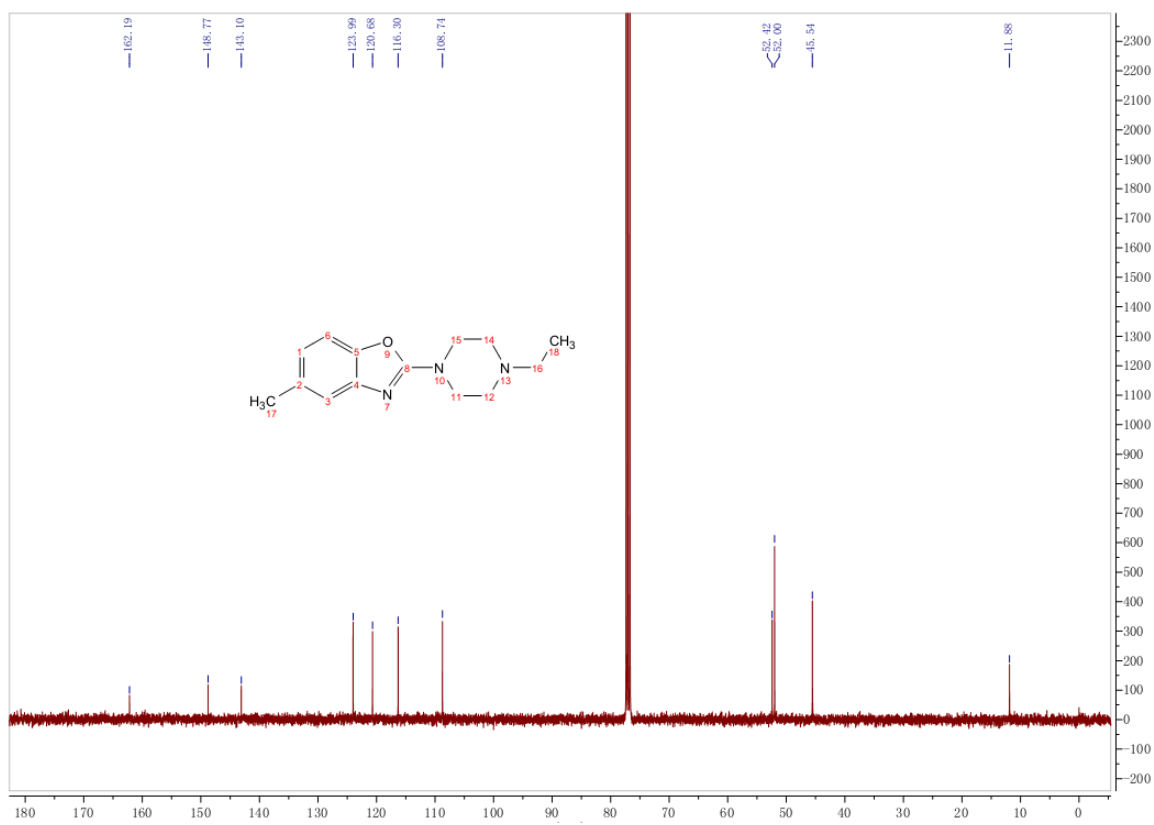

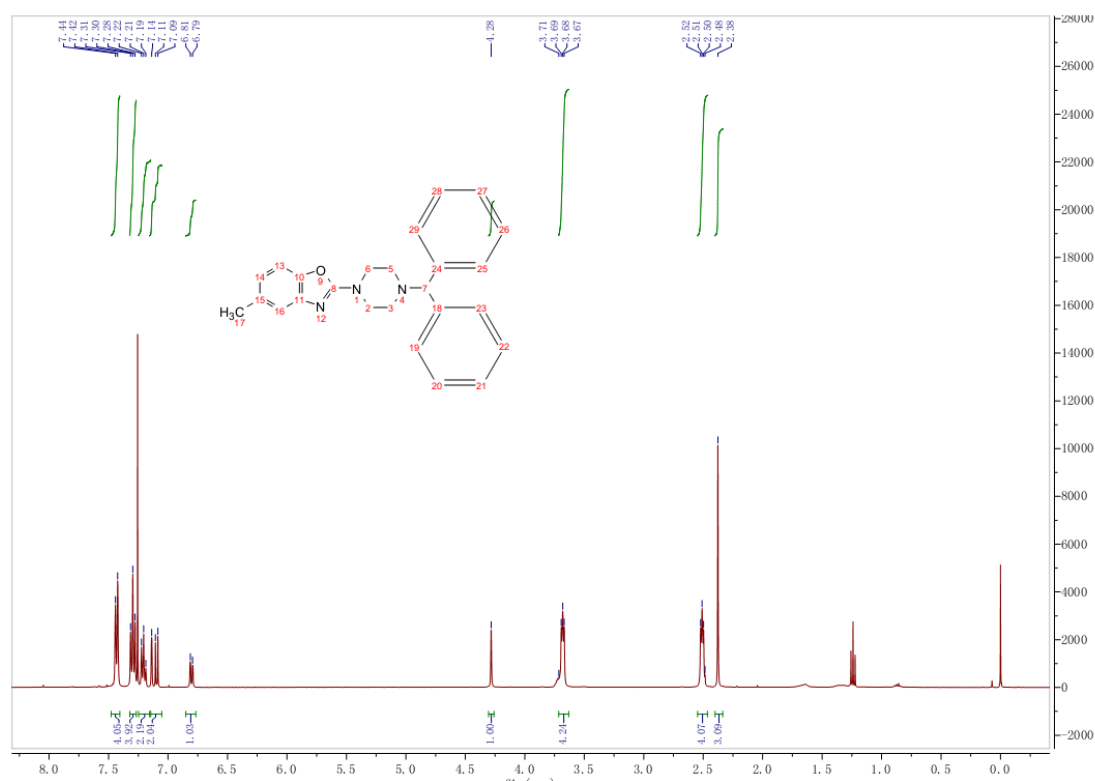

5

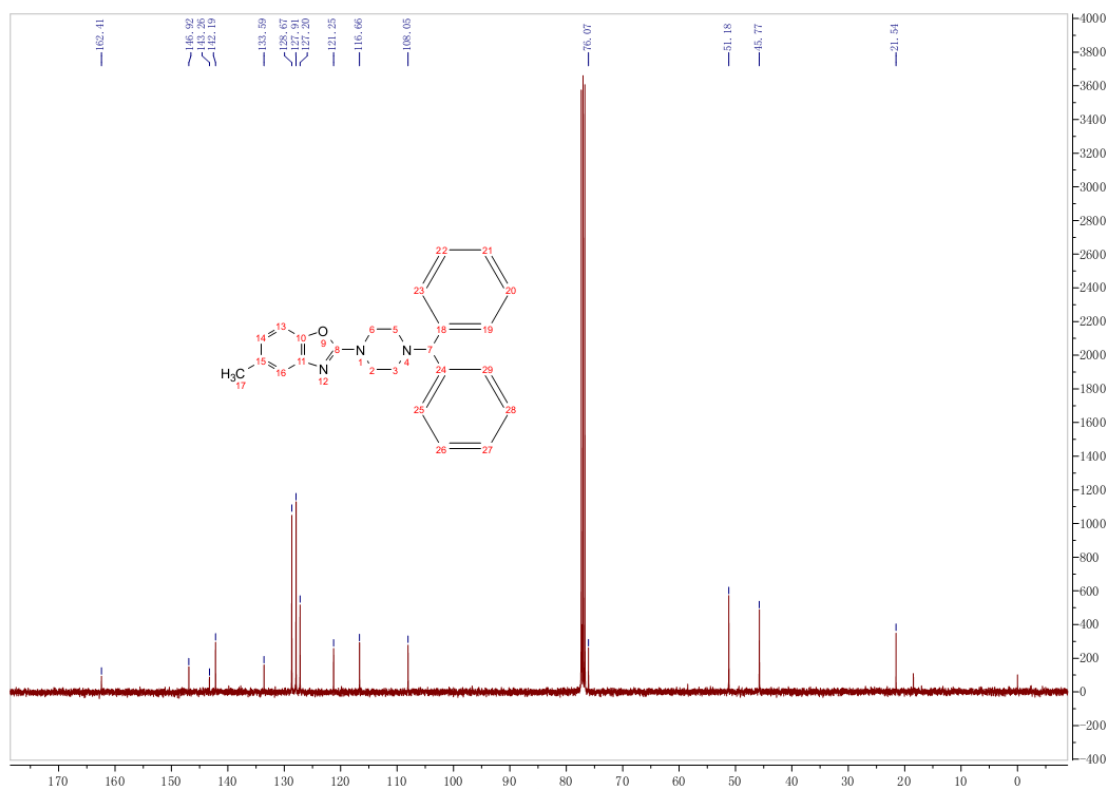

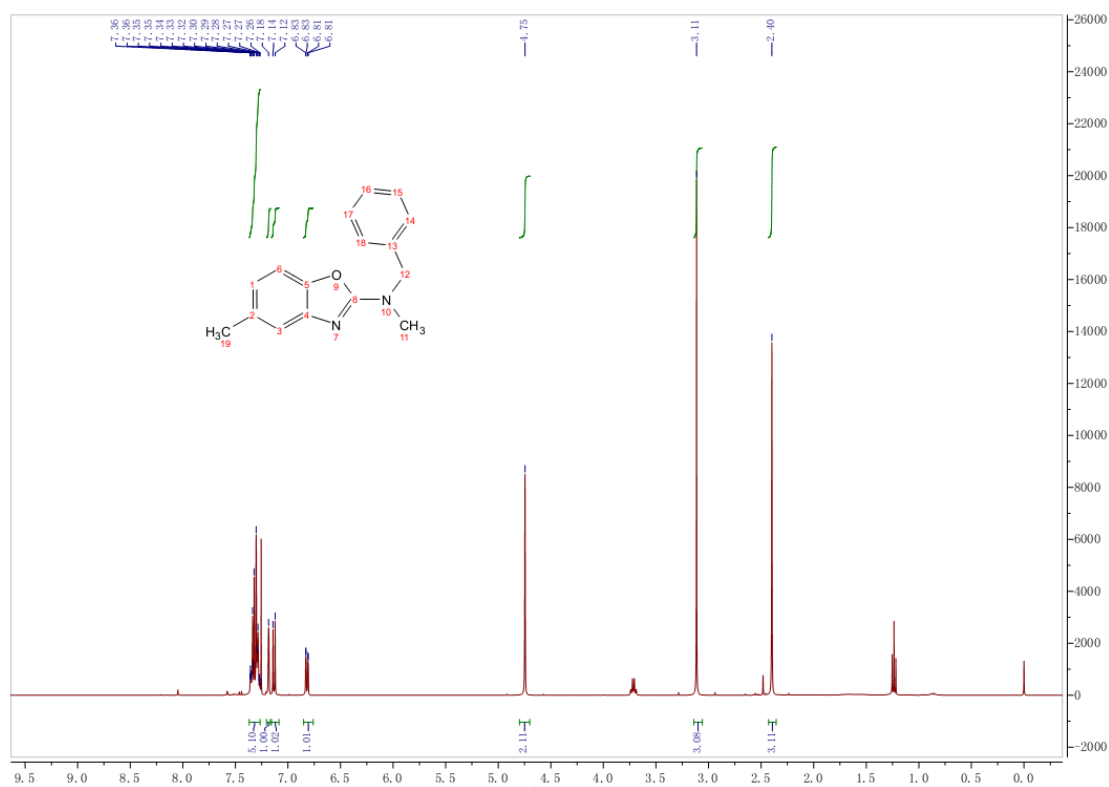

5

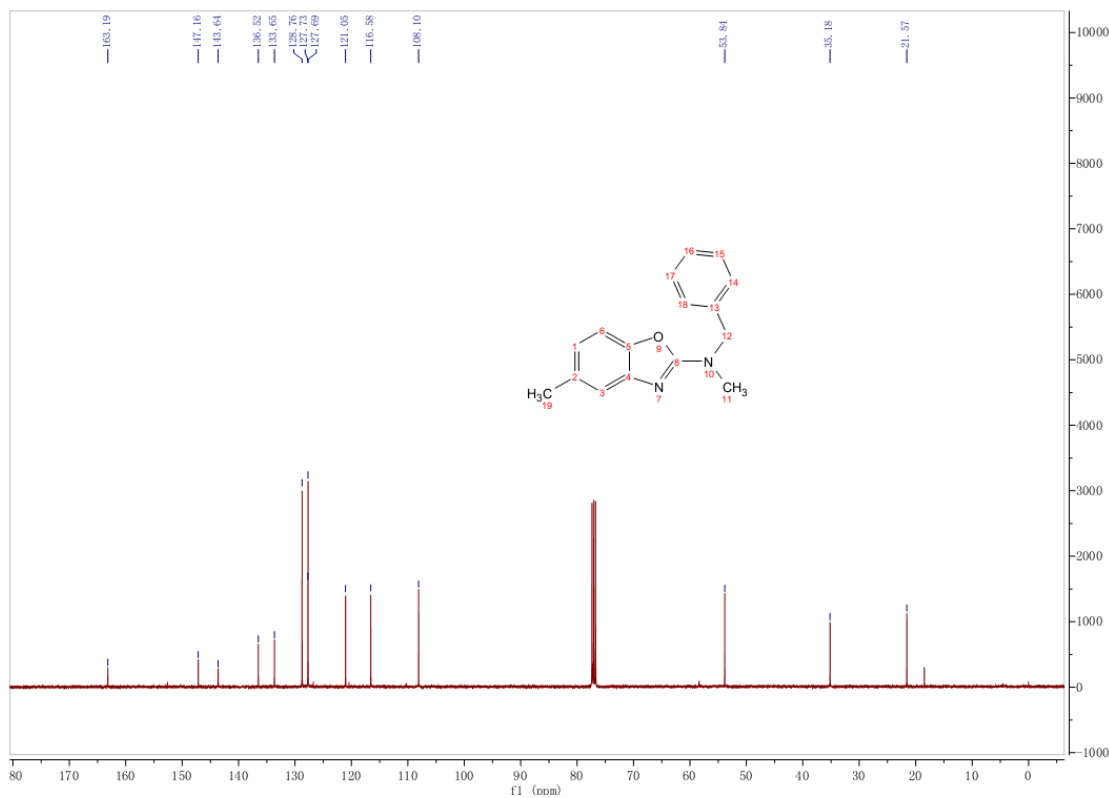

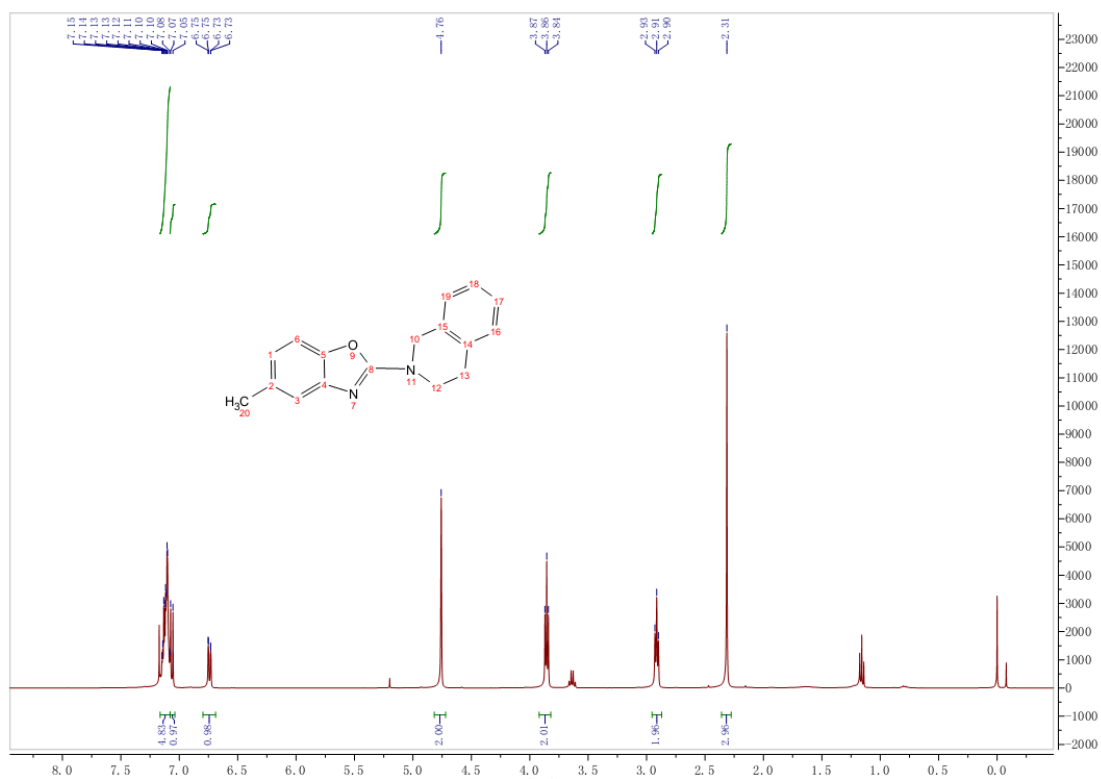

5

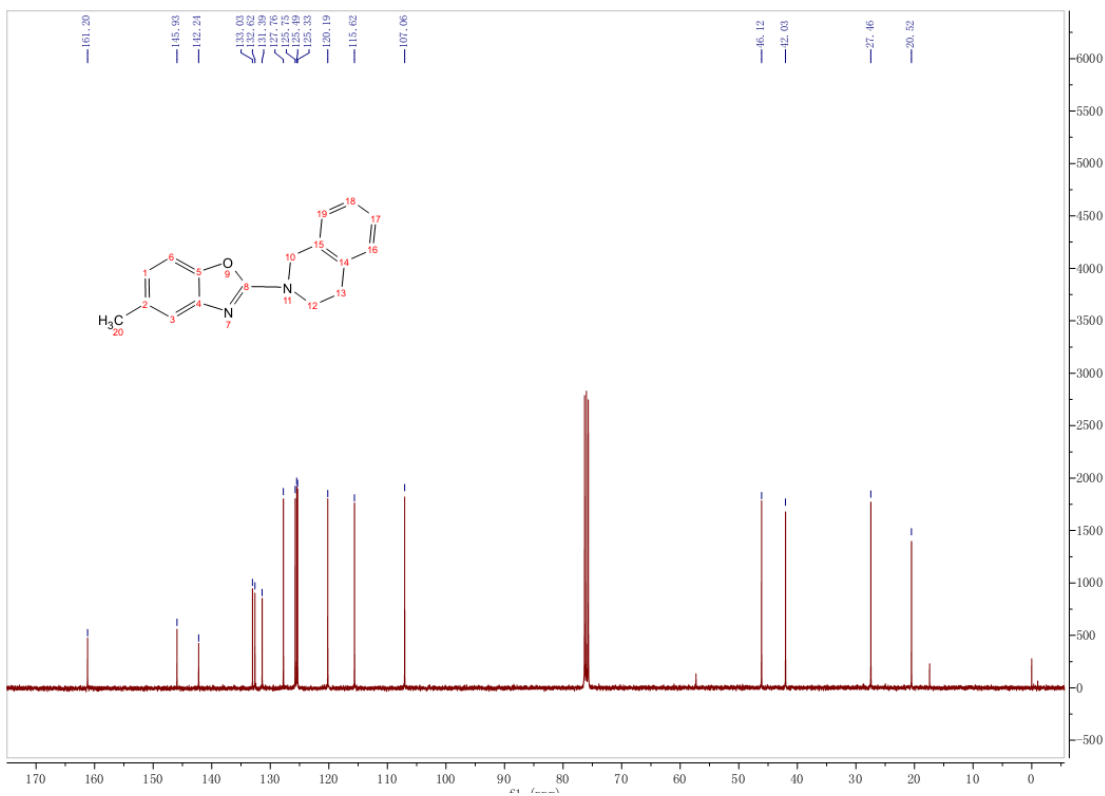

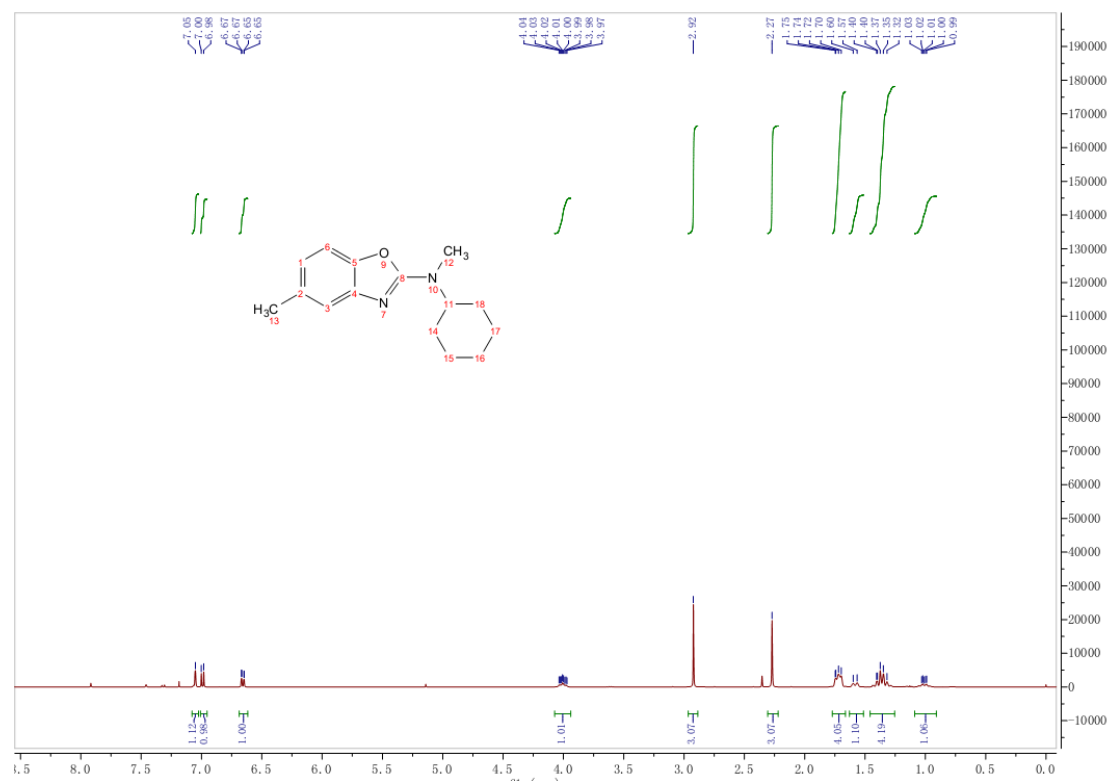

5

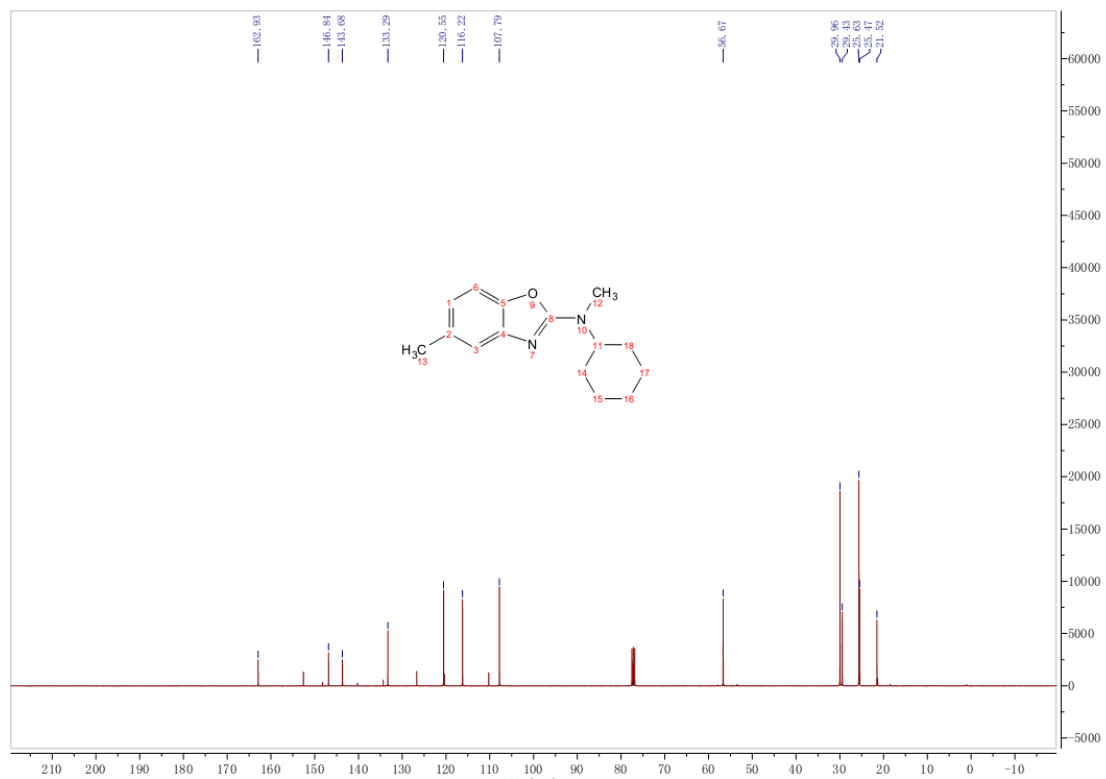



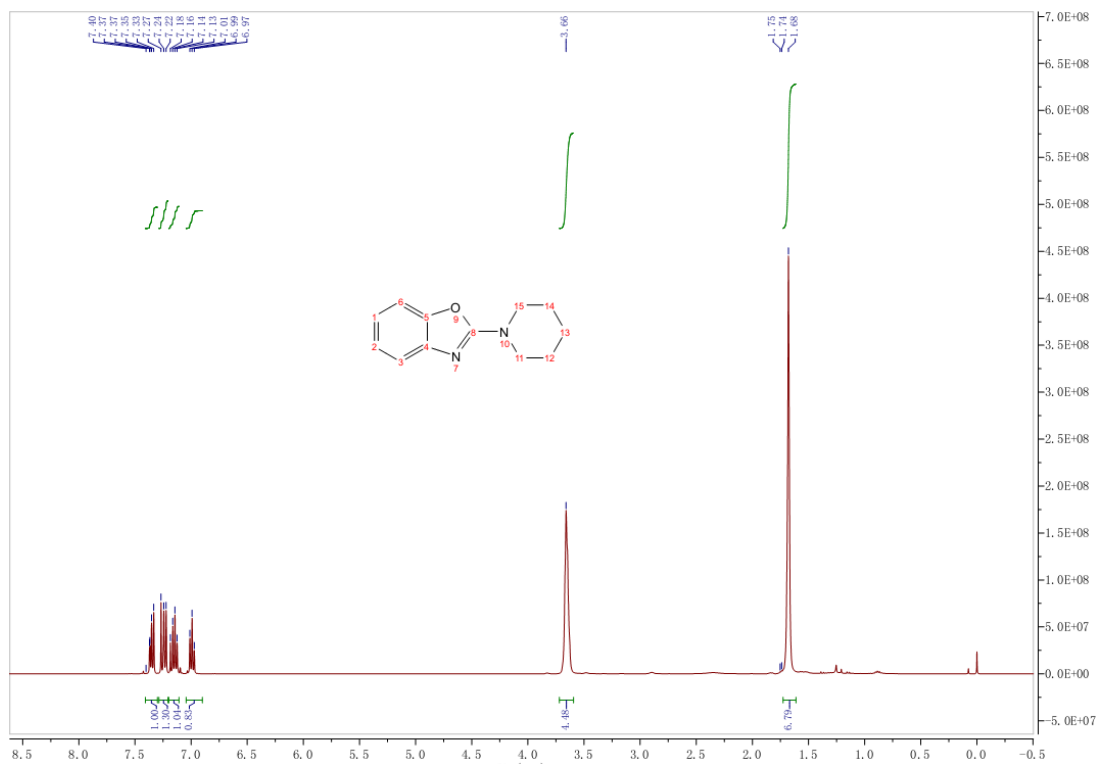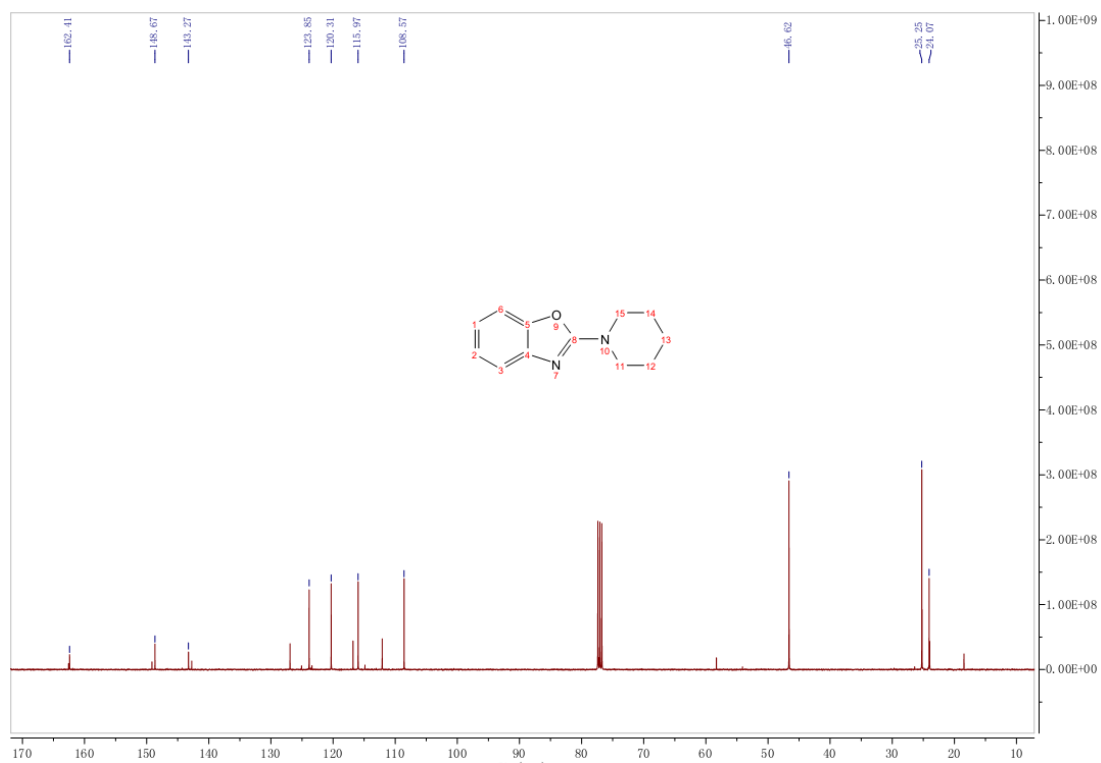

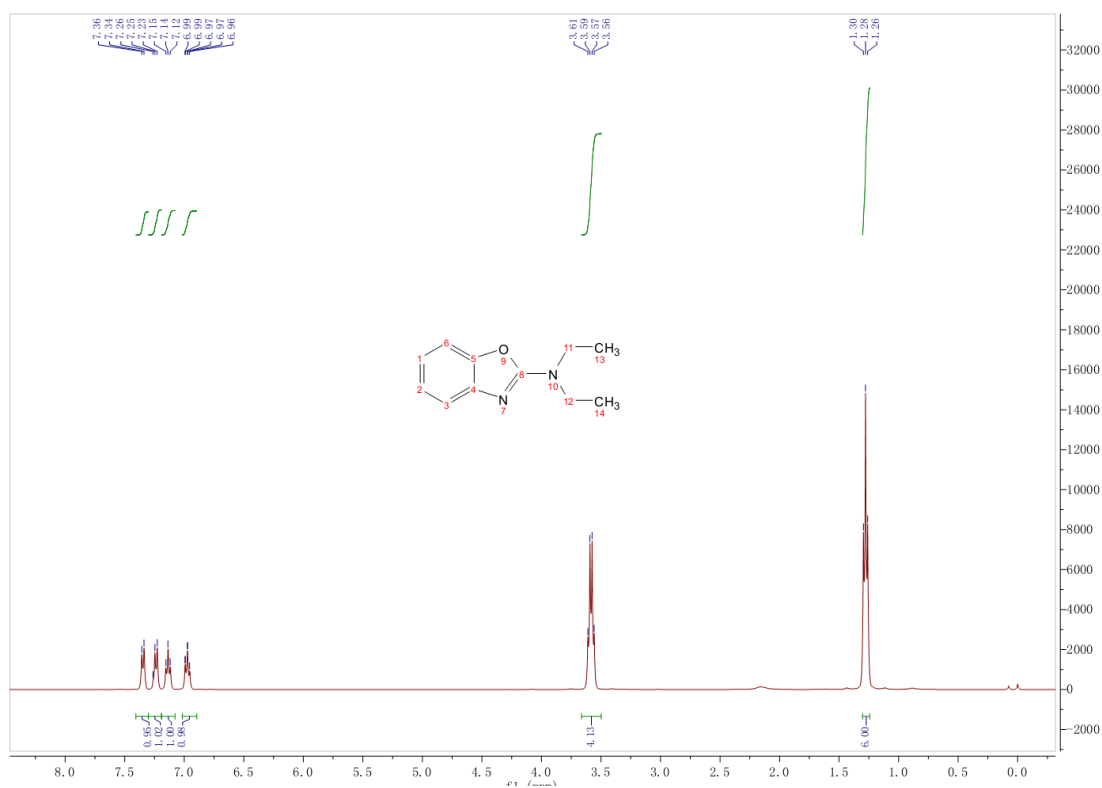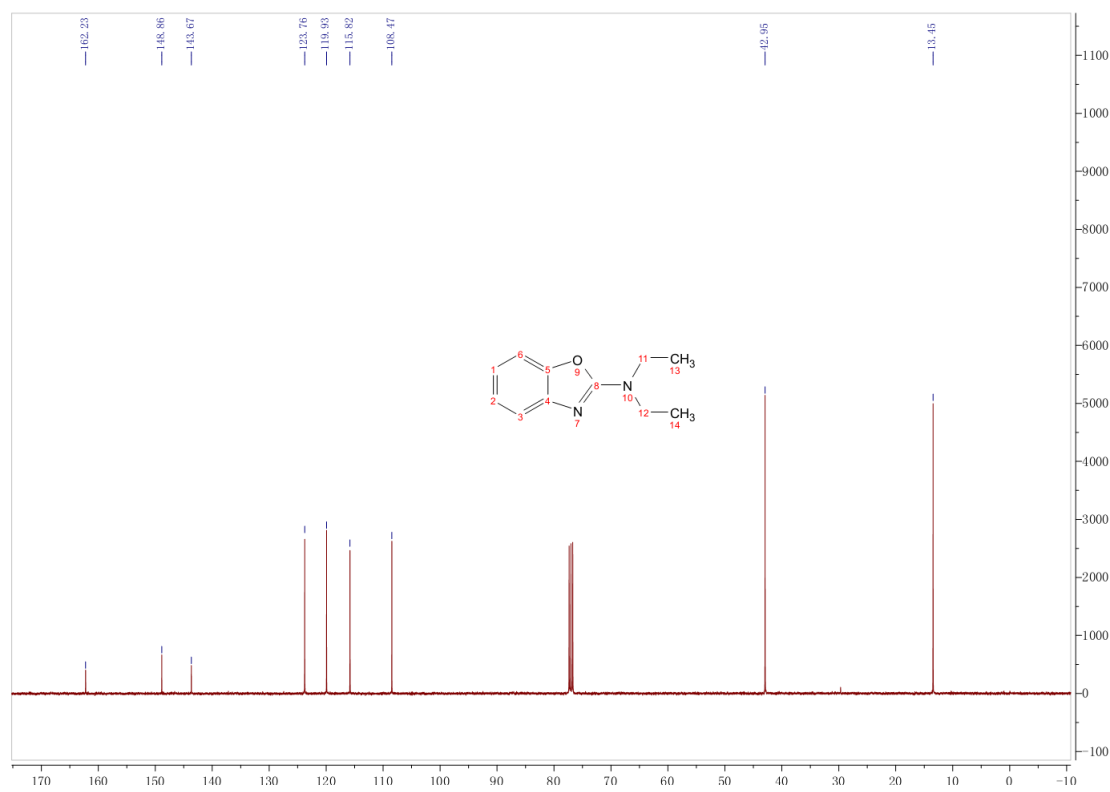

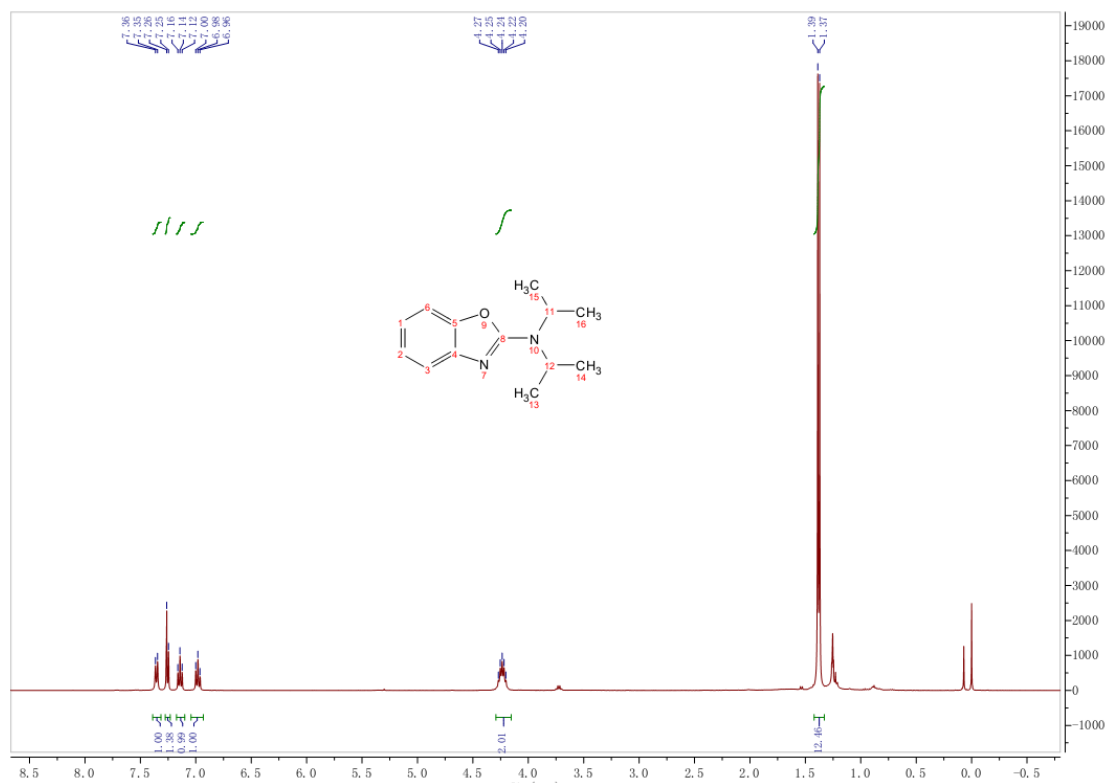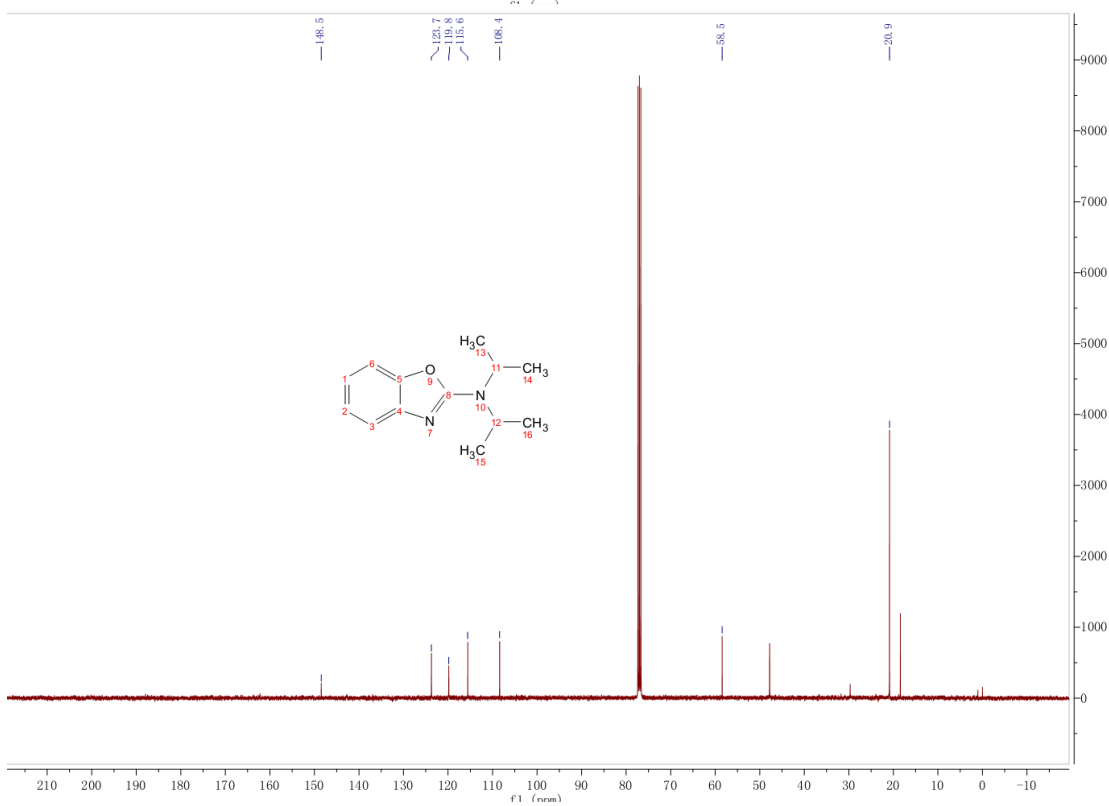

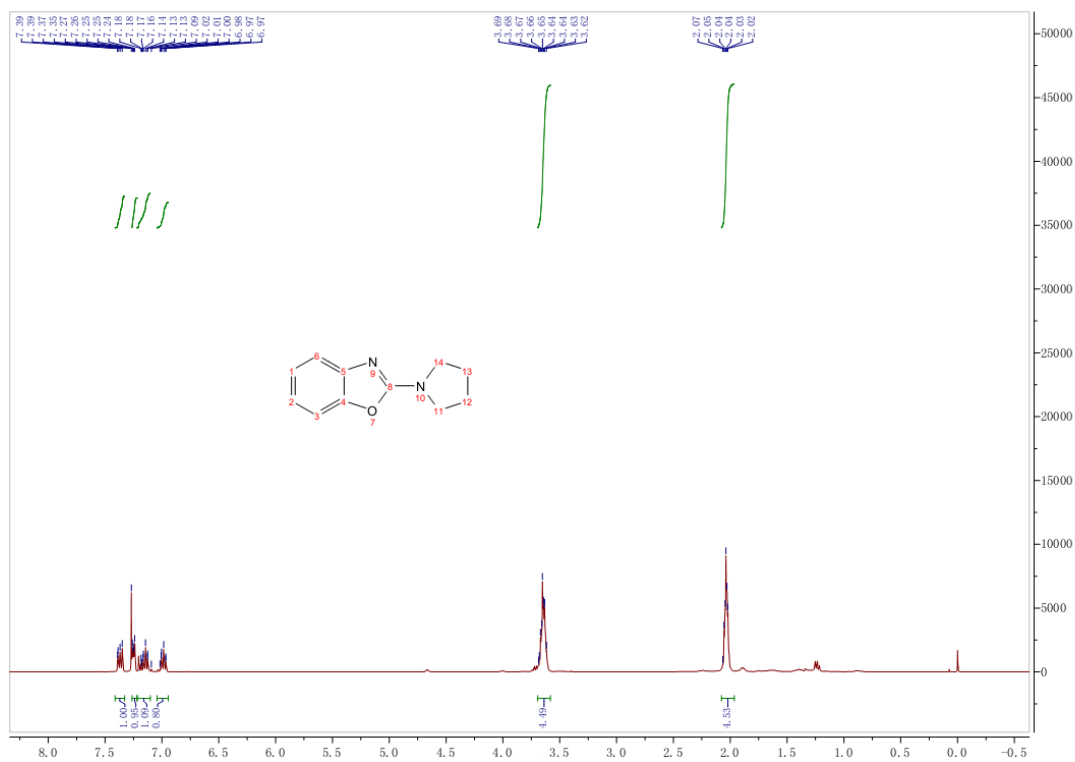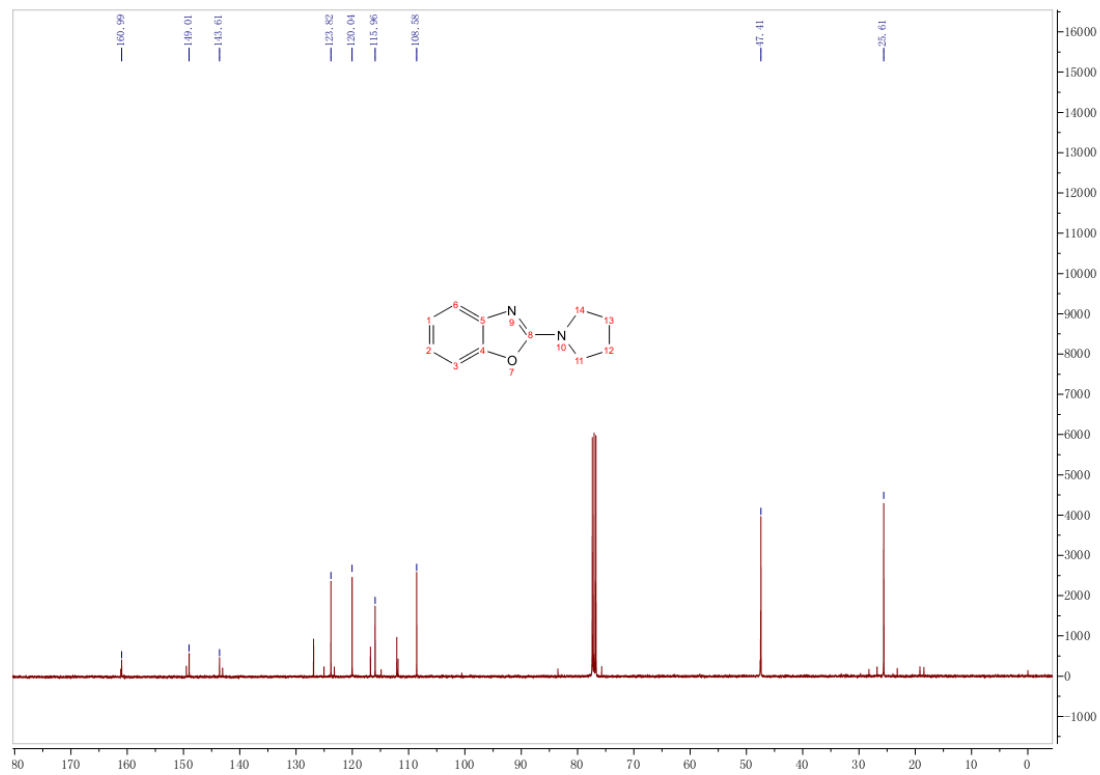

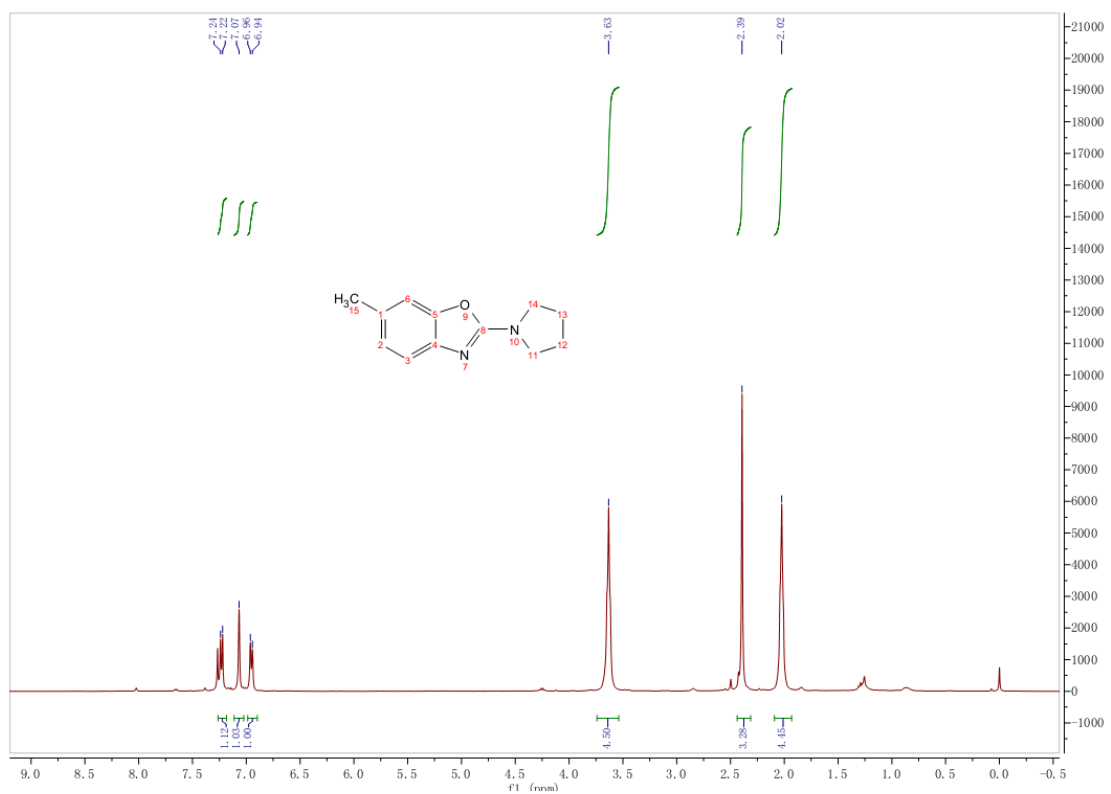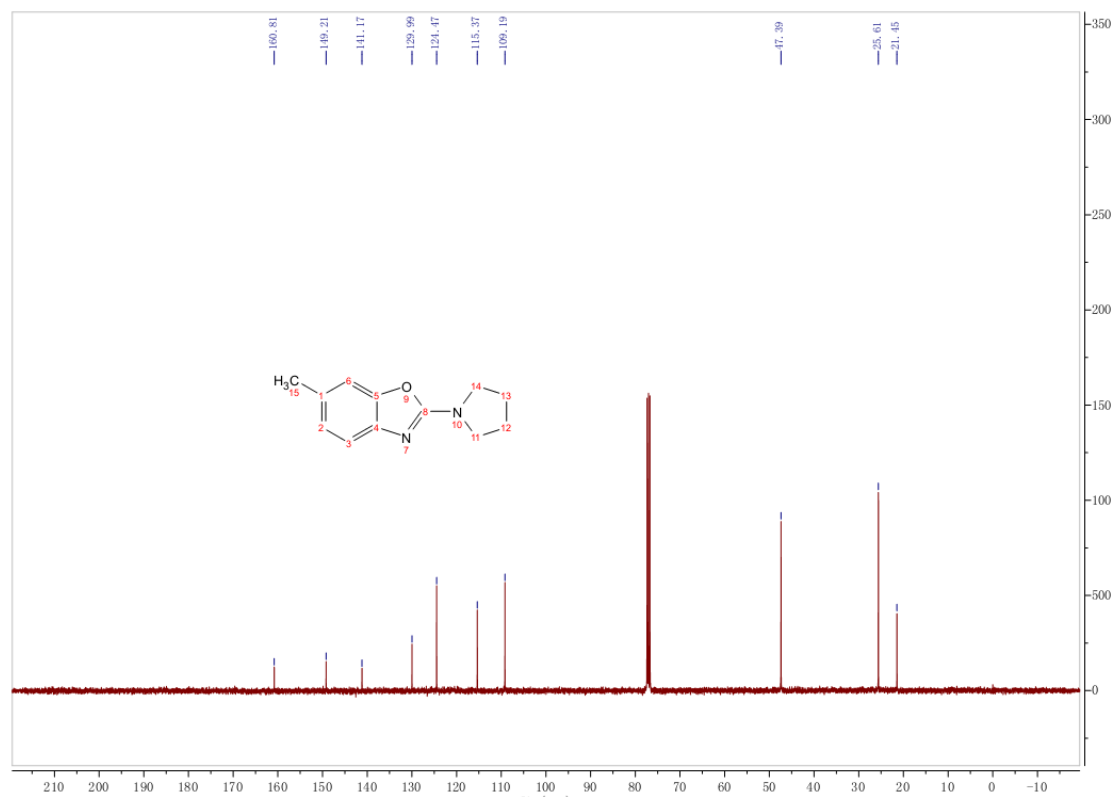

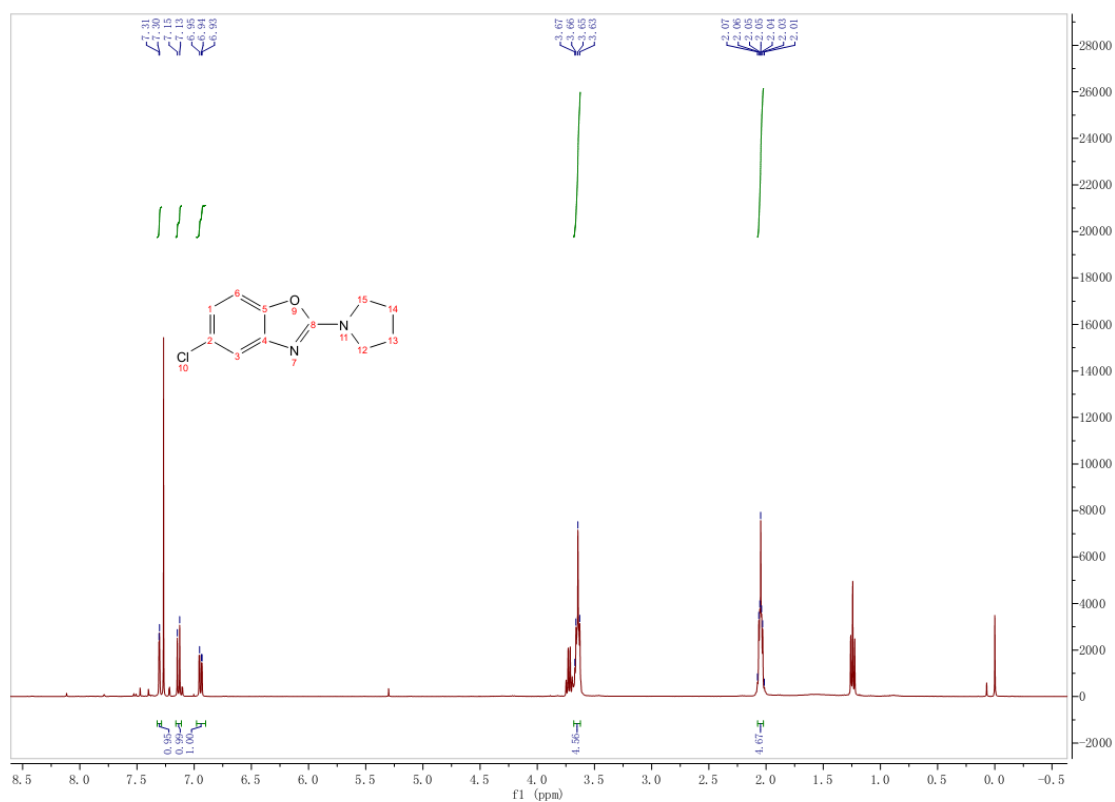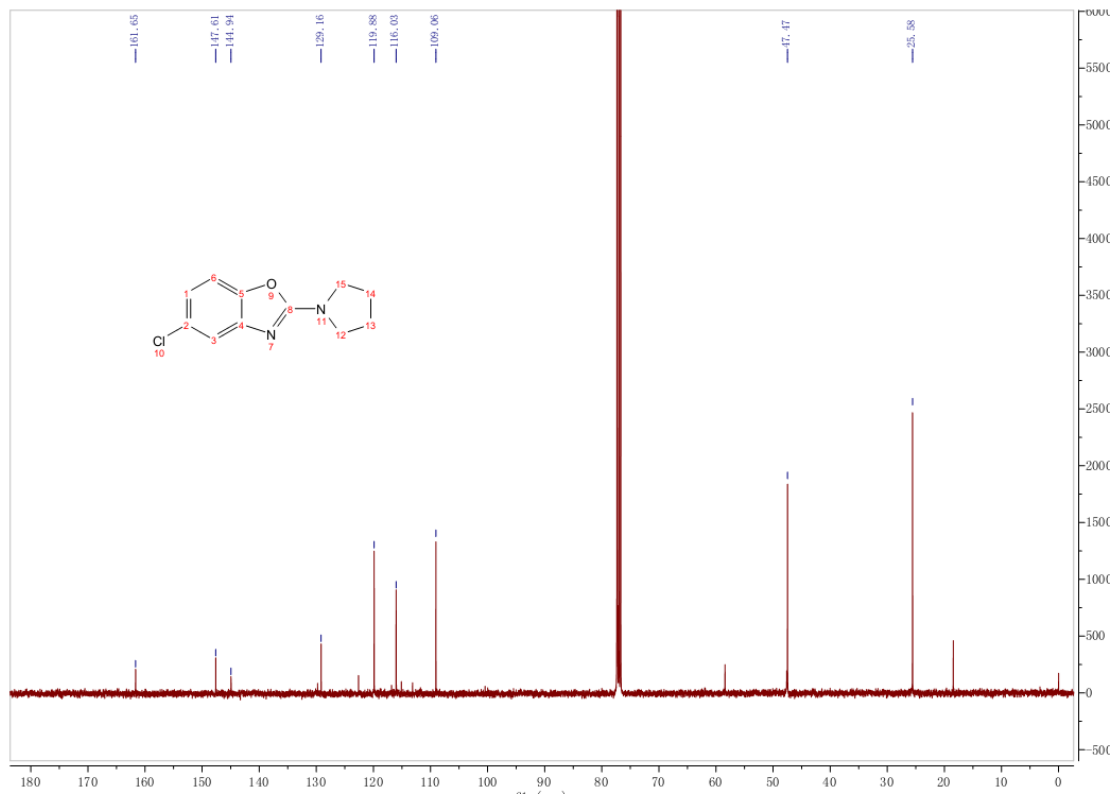

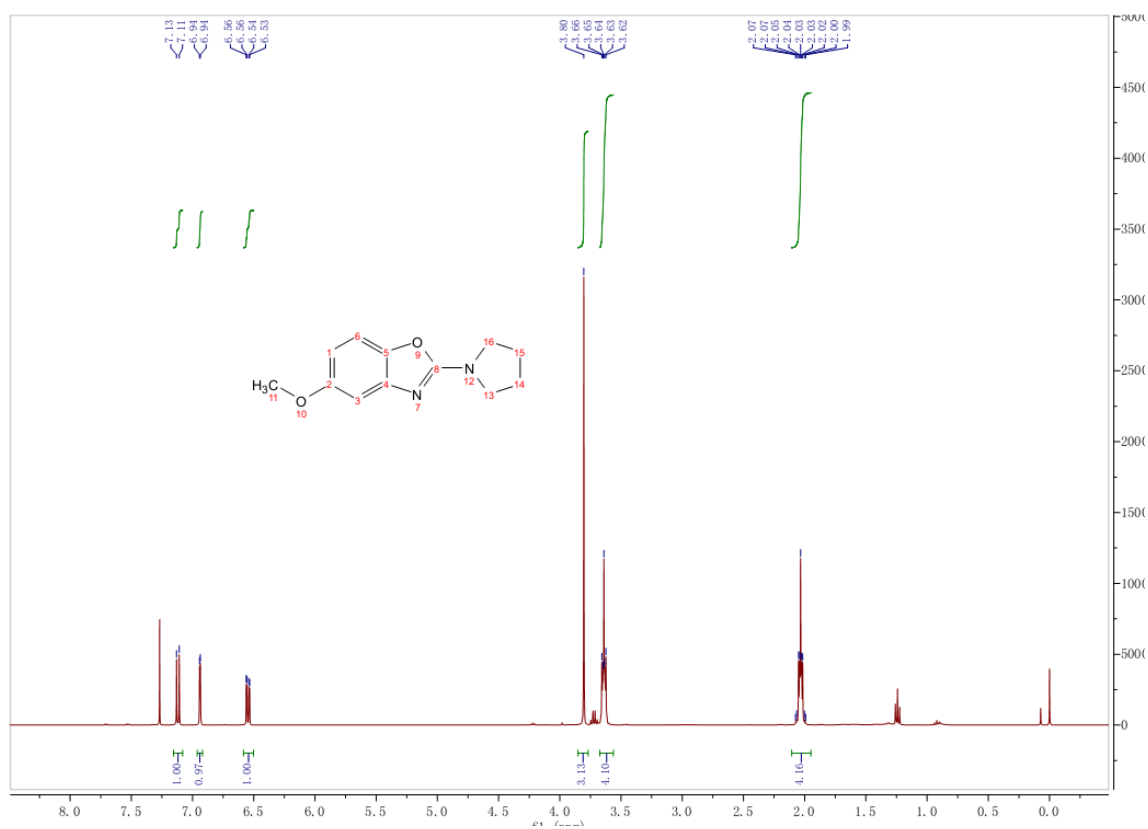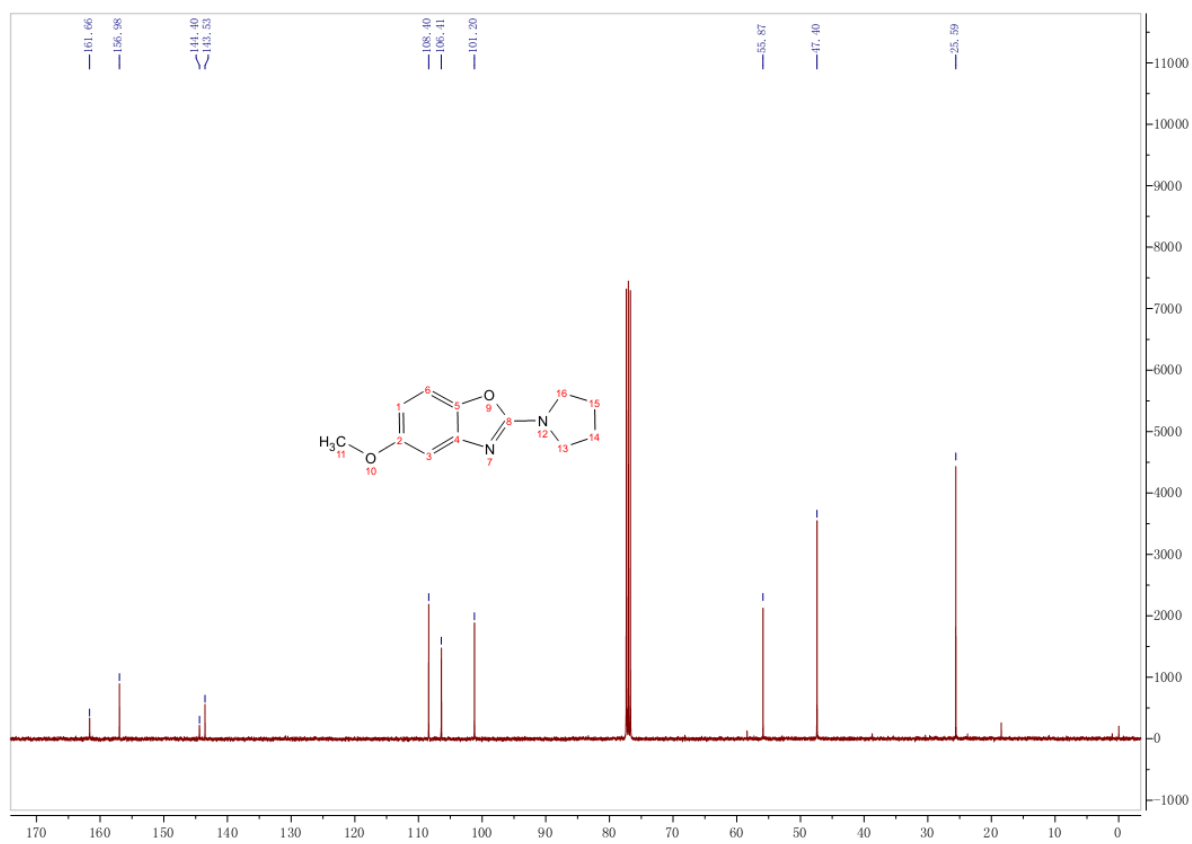

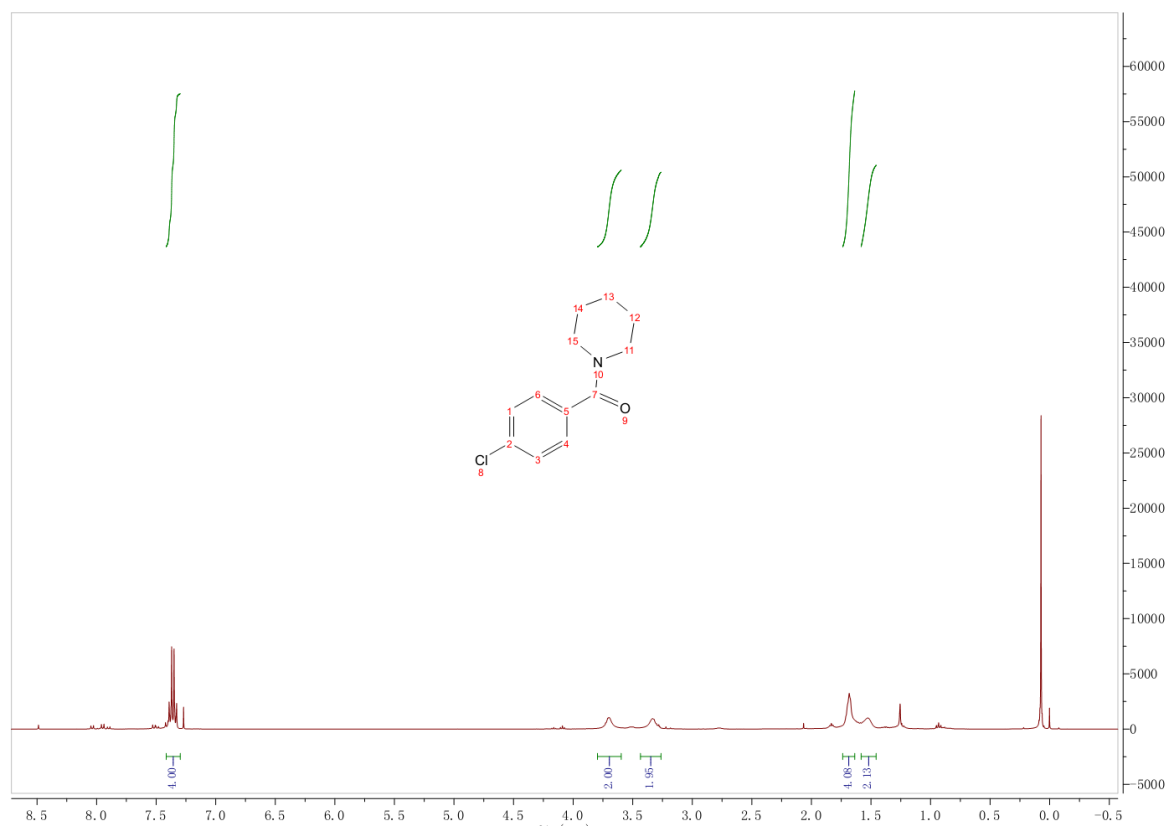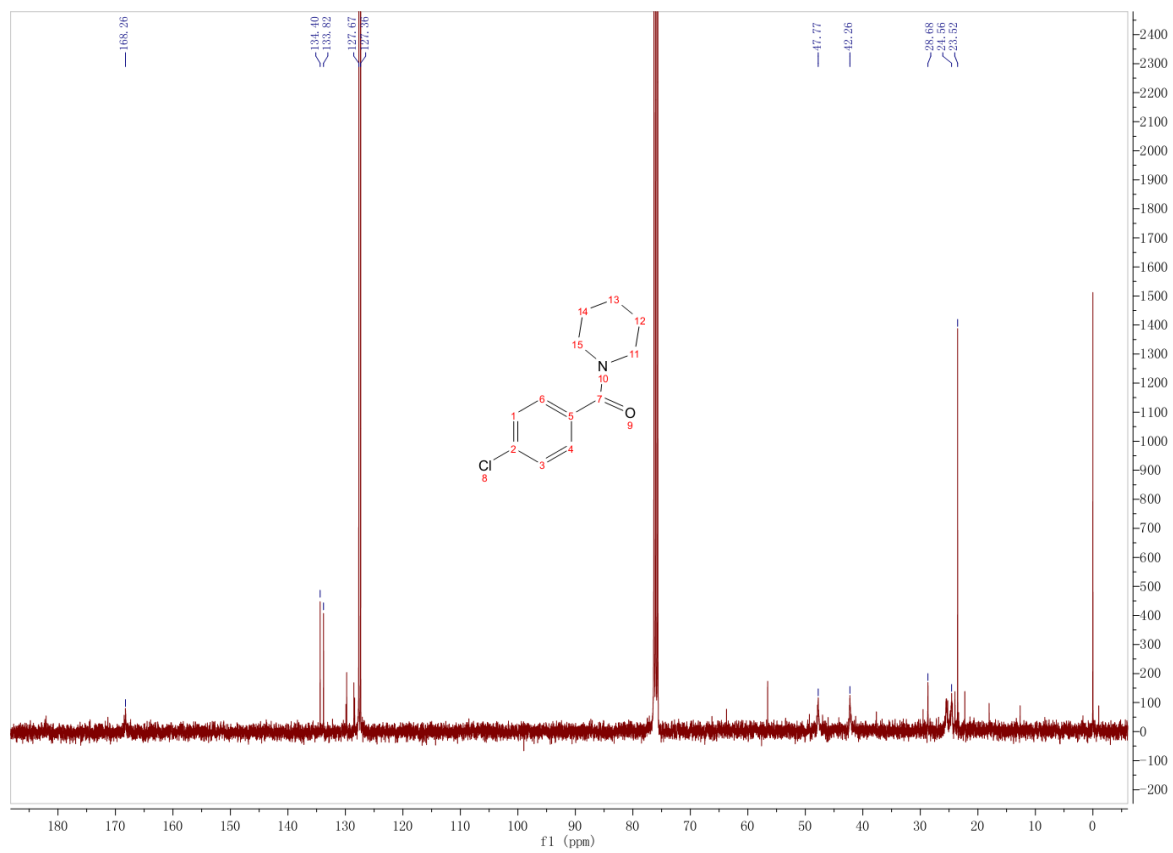

Supplement: c3gc41206g.pdf [file c3gc41206g.pdf]
